# Supplementary material for: Local over Global: Anthropogenic Stressors Outpace Climate Impacts on Coral Reef Collapse in the South China Sea
Source: Research Square preprint supplement (doi:10.21203/rs.3.rs-6545472/v1), 2025-06-20
Supplement: Supplementary file 1 [file 9b64cc358515b7b22812ba00.xlsx]

## Sheet: socio-economic
Region	City	Site	Time	Phase	Rural POP	Urban POP	POP	Tourist travel	T_POP	N_agr	P_agr	N_Crop production	P_Crop production	N_Livestock production	P_Livestock production	N_Mariculture	P_Mariculture	N_freshwater culture	P_freshwater culture	N_Human consumption	P_Human consumption	Year Rainfall	Construction Area	Total Construction Area	Cultivated land Area	MaricultureArea	Mariculture Production	Fishing Production	Forest Area	Afforestation area
HNE	Qionghai	QH1	2000	A	357614	90501	448115	536685	11154.2	6054.83	876.652	3831.6	251.971	1966.7	603.821	54.804	2.01962	201.732	18.84	505.371	58.9248	2611.3	137084	948000	26052	763	2995	27628	48570.7	0
HNE	Qionghai	QH1	2001	A	358986	91661	450647	597970	12427.9	5689.58	855.579	3610.78	244.392	1721.11	566.941	149.535	24.7302	208.165	19.5156	511.883	59.7464	2323.3	280160	1030000	24507	859	5405	32484	48570.7	819
HNE	Qionghai	QH1	2002	A	359987	92150	452137	653029	13572.3	5957.24	919.535	3766.28	301.96	1722.56	560.788	169.033	28.0485	299.365	28.7383	514.796	60.1106	1775.3	255904	1342000	23979	854	5980	36195	49389.7	972
HNE	Qionghai	QH1	2003	A	360143	94321	454464	572826	11905.4	6299.41	917.649	4412.96	405.669	1466.7	459.389	184.832	30.6335	234.914	21.9579	526.023	61.5463	1764	270912	955000	23847	850	6466	40940	50361.7	4672
HNE	Qionghai	QH1	2004	A	319175	139895	459070	656495	13644.3	6551.01	905.664	4650.44	410.266	1463.29	465.137	168.731	4.81393	268.545	25.4469	744.086	89.8185	1279.4		496000	23996	879	7220	44986	55033.7	1088
HNE	Qionghai	QH1	2005	A	322652	140757	463409	670554	13936.5	7241.52	946.803	5292.69	412.44	1366.3	464.862	294.892	42.1657	287.649	27.3347	749.903	90.5327	1929.2	226172	239200	23941	881	8115	49696	56121.7	375
HNE	Qionghai	QH1	2006	A	326690	143222	469912	687429	14287.2	7048.65	936.518	5177.29	463.38	1200.52	392.926	280.27	42.8377	390.575	37.3739	764.188	92.3259	1795.6	265366	640300	23941	901	8280	51450	56496.7	259
HNE	Qionghai	QH1	2007	A	330922	145490	476412	750644	15601.1	8496.55	866.336	6965.48	476.172	1035.78	327.914	176.269	30.5916	319.024	31.659	777.537	93.9976	1664.7	307391	901400	22583	409	6138	38980	56755.7	207
HNE	Qionghai	QH1	2008	A	334388	148103	482491	794850	16519.8	8977.11	1007.12	7163.12	509.678	1268.81	429.56	167.821	30.5002	377.359	37.3788	792.351	95.8635	2388.3	554102	1596700	22525	516	5763	39310	56962.7	578
HNE	Qionghai	QH1	2009	A	338261	150072	488333	822185	17087.9	8835.86	1014.1	7032.74	515.905	1254.45	430.751	167.911	29.1354	380.758	38.3062	804.024	97.3238	2768.5	357197	2736200	22535	771	5636	39208	57540.7	542
HNE	Qionghai	QH1	2010	B	343260	153132	496392	906000	18829.9	8788.81	1004.61	7002.1	526.901	1174.32	404.709	190.921	32.347	421.47	40.6563	821.563	99.5257	2831.7	408184	3620400	22517	772	5953	38389	58082.7	81
HNE	Qionghai	QH1	2011	B	287400	199500	486900	1030763	21422.9	8797.61	1089.87	6882.75	587.435	1202.53	417.405	225.24	37.9582	487.093	47.073	787.19	94.6466	1895.2	468024	4466500	23314	860	7252	41852	58163.7	305
HNE	Qionghai	QH1	2012	B	284300	206400	490700	1852002	38491.2	10207.4	1201.44	8155.05	624.731	1318.04	492.068	200.155	32.9573	534.168	51.682	801.791	96.5817	2114.4	805379	5120479	23314	766	6609	47473	58468.7	372
HNE	Qionghai	QH1	2013	B	279900	215200	495100	2081099	43252.6	9682.83	1185.27	7544.1	587.919	1306.79	499.657	221.844	38.2949	610.094	59.4007	819.981	99.0038	2481.1	793749	3930049	23280	553	7586	47967	58840.7	553
HNE	Qionghai	QH1	2014	B	276400	222500	498900	2429678	50497.4	9174.09	1050.03	7795.93	612.568	1118.46	396.182	233.564	41.0277	26.142	0.251101	835.215	101.028	2250.9	1148528	4158928	23277	622	7918	60656	59393.7	490
HNE	Qionghai	QH1	2015	C	270700	231800	502500	2796012	58111.1	10622	1242.47	8486.27	669.181	1272.21	469.004	260.943	44.8991	602.626	59.3843	853.422	103.48	1422	1134671	3445971	23178	628	8700	66100	59883.7	244
HNE	Qionghai	QH1	2016	C	262400	243700	506100	3166204	65805	10445.8	1234.97	8334.01	654.952	1216.57	471.547	285.945	48.2915	609.255	60.183	875.745	106.514	1728.3	851401	3404501	22988	623	8815	67701	60127.7	126
HNE	Qionghai	QH1	2017	C	255300	255500	510800	3349388	69612.2	8484.33	1047.02	6312.09	437.161	1290.37	503.015	287.261	48.2058	594.604	58.6362	898.974	109.639	2338.9	579874	2993174	23038	612	8400	63700	60253.7	96
HNE	Qionghai	QH1	2018	C	248900	266800	515700	3464583	72006.4	9767.23	1198.65	7691.94	585.945	1312.19	517.316	292.959	49.1253	470.139	46.2647	921.605	112.672	1930.8	591873	3039273	23049	601	8191	53733	60349.7	102
HNE	Qionghai	QH1	2019	C	250700	270700	521400	3503108	72807.1	8698.07	1111.97	6851.5	553.397	1145.03	470.372	289.933	48.0267	411.616	40.1781	933.394	114.141	2301.4	562158	3632173	23049	592	8150	51300	60451.7	135
HNE	Qionghai	QH1	2020	C	266900	263600	530500	3009196	62541.8	9417.58	1219.7	6995.78	527.153	1748.17	607.013	290.083	47.7601	383.543	37.7752	930.868	113.475	1612.7	1715005	4882505	23028	583	8220	48140	60586.7	21
HNE	Wenchang	WC1	2000	A	444149	90518	534667	215325	4475.22	5799.77	670.35	3899.91	223.304	1593.94	422.996	93.1489	3.75176	212.774	20.2983	917.955	111.697	2333.3	54795	1060000	40048	1878	4504	23933	55339	1170
HNE	Wenchang	WC1	2001	A	445614	92142	537756	251831	5233.95	5450.7	702.827	3307.82	170.135	1552.31	459.354	355.725	50.88	234.843	22.4582	920.104	111.963	2217.7	95408	932000	40022	2130	10208	27258	56509	1606
HNE	Wenchang	WC1	2002	A	444767	93792	538559	258693	5374.94	6405.79	864.673	3919.36	248.977	1650.51	512.397	538.969	74.5623	296.954	28.7362	922.436	112.249	1913.5	104392	822000	39984	2415	15830	29880	58115	1809
HNE	Wenchang	WC1	2003	A	445646	95084	540730	116130	2413.6	6841.44	839.745	4225.23	270.338	1522.56	432.9	691.244	97.5386	402.402	38.9684	923.246	112.365	1662.8	118192	554000	37958	2493	20225	30487	59924	5059
HNE	Wenchang	WC1	2004	A	423568	119559	543127	150422	3126.3	7921.13	916.156	5138.86	308.962	1708.9	535.617	506.805	16.2959	566.562	55.2808	943.141	115.047	1196.5		621000	37753	2497	22470	32736	64983	1515
HNE	Wenchang	WC1	2005	A	422210	117529	539739	174819	3633.36	8423.34	1274.49	4654.62	316.414	2122.07	759.222	841.237	119.846	805.415	79.0098	940.6	114.73	1352.6	92308	791000	37537	2637	23785	33045	66498	3366
HNE	Wenchang	WC1	2006	A	430246	119530	549776	203044	4219.98	8605.93	1250.7	4537.18	315.373	1989.34	671.216	864.889	145.731	1214.51	118.384	944.975	115.241	1586.9	165728	862800	37537	2830	26790	35780	69864	1983
HNE	Wenchang	WC1	2007	A	438785	121568	560353	217044	4510.95	7875.04	1154.81	4170.93	361.751	1688.95	541.551	785.549	127.978	1229.61	123.526	949.531	115.772	1688.4	253226	1026700	35645	1351	21853	26510	71847	1640
HNE	Wenchang	WC1	2008	A	447132	123663	570795	289153	6009.63	9426.88	1356.13	5298.94	435.02	1946.95	652.015	753.483	125.465	1427.5	143.632	954.093	116.304	2661.4	427585	1593900	35863	1355	20513	26519	73487	1777
HNE	Wenchang	WC1	2009	A	452257	124517	576774	351772	7311.08	9594	1427.23	5079.57	438.132	2052.51	687.724	888.321	145.705	1573.6	155.664	956.434	116.572	2505.5	1106786	2883600	35845	2086	24525	27496	75264	2492
HNE	Wenchang	WC1	2010	B	458932	125673	584605	485341	10087.1	9736.13	1469.49	5202.9	455.645	2007.02	706.495	930.905	150.399	1595.31	156.951	959.529	116.928	2874	665285	5050100	36161	3004	24547	27998	77756	2339
HNE	Wenchang	WC1	2011	B	283800	255900	539700	586779	12195.4	10195.8	1479.38	5240.35	443.906	2002.09	678.998	1041.35	168.043	1911.98	188.434	927.586	112.695	1769.6	631731	6183300	37930	3337	27715	20729	80095	1920
HNE	Wenchang	WC1	2012	B	279400	263000	542400	1255270	26089	10873.6	1662.39	5442.01	473.155	2248.74	802.357	1149.02	186.035	2033.8	200.84	941.439	114.562	2149.1	549319	4071719	37930	3571	31646	26127	82015	975
HNE	Wenchang	WC1	2013	B	279700	267600	547300	1372591	28527.3	11737.1	1741.86	5864.72	492.971	2241.27	807.002	1247.82	205.191	2383.33	236.694	976.68	119.067	2119.8	392810	4054410	37010	3652	36328	26026	82990	519
HNE	Wenchang	WC1	2014	B	278400	272300	550700	1517473	31538.5	11109.1	1423.93	6408.79	508.047	1534.76	518.299	1142.63	197.323	2022.91	200.259	964.196	117.496	2242.1	190777	3952577	36856	2571	34530	30656	83509	552
HNE	Wenchang	WC1	2015	C	275400	279500	554900	1738391	36130	12888.4	1735.46	6946.45	539.932	2059.05	700.41	1602.74	269.053	2280.17	226.061	979.66	119.54	1530.4	183415	4357815	36728	2629	43933	32270	84061	3545
HNE	Wenchang	WC1	2016	C	271100	287700	558800	1991442	41389.3	13026	1753.44	6848.74	553.029	1864.26	642.46	1885.3	316.693	2427.72	241.26	996.416	121.776	1727	280174	5192974	37708	3092	52202	32966	87606	4417
HNE	Wenchang	WC1	2017	C	266300	297200	563500	2182799	45366.3	13921	1946.8	6953.68	548.688	2027.94	742.971	2618.69	424.074	2320.65	231.068	1016	124.386	1698	139688	5979588	39921	5065	73129	31320	92023	918
HNE	Wenchang	WC1	2018	C	263100	305800	568900	2391473	49703.3	13168.7	1932.99	6285.27	487.282	2255.35	822.563	2602.75	421.806	2025.34	201.341	1034.85	126.866	1344.3	142375	5046175	39896	4707	73599	29841	92941	64
HNE	Wenchang	WC1	2019	C	265000	310200	575200	2697758	56069	13871.4	2121.81	6159.91	489.574	2571.25	933.538	3041.25	490.564	2098.97	208.134	1048.01	128.508	1442.3	105753	4419188	40774	4651	84711	30540	93005	153
HNE	Wenchang	WC1	2020	C	220400	343900	564300	2598732	54010.9	15092.8	2263.53	6791.16	455.743	3156.76	1105.93	2903.12	479.025	2241.72	222.833	1090.7	134.925	1332.7	103691	3236591	40863	4613	84538	34956	93158	303
HNS	Sanya	SY1	2000	A	301479	173588	475067	2052066	42649.2	3296.35	260.054	2243.54	111.262	920.539	138.779	95.8624	6.83179	36.4104	3.18111	812.511	98.3622	1726.3	59430	409000	12067	801	4964	47510	40731	44
HNS	Sanya	SY1	2001	A	304333	181660	485993	2402949	49941.8	3688.59	321.149	2314.22	112.01	1111.18	169.969	218.579	35.2775	44.6159	3.89235	838.932	101.757	1634.8	186472	1064000	11975	867	5681	51978	40775	1158
HNS	Sanya	SY1	2002	A	309215	186476	495691	2781861	57817	3252.29	309.66	1934.11	97.497	970.524	159.509	296.699	48.1418	50.9567	4.51205	853.376	103.56	1459.8	193285	1238000	12127	885	7944	54572	41933	1192
HNS	Sanya	SY1	2003	A	314331	189530	503861	3004095	62435.8	3338.32	347.032	1947.19	120.092	1009.3	168.508	326.943	53.3648	54.881	5.06694	870.649	105.728	1321.7	384091	1163000	12056	854	8798	58866	43125	3290
HNS	Sanya	SY1	2004	A	256350	251173	507523	3638395	65825.6	3517.08	303.321	2196.88	122.48	1101.56	167.549	156.952	7.53555	61.6966	5.75638	883.624	107.324	1053.1		573000	12082	977	10225	57559	46415	633
HNS	Sanya	SY1	2005	A	255778	256169	511947	4065889	84503.7	3991.49	378.899	2391.3	140.658	1213.6	205.777	326.082	26.8763	60.5163	5.58726	899.73	109.293	1801.9	711189	2977600	11930	946	11089	61812	47048	132
HNS	Sanya	SY1	2006	A	262938	261232	524170	4549036	94545.2	4126.75	437.693	2322.44	138.873	1292.77	220.015	443.182	72.5738	68.3621	6.23155	934.758	113.836	962.1	38272	3550500	11930	1225	12416	64631	47180	471
HNS	Sanya	SY1	2007	A	266776	268439	535215	5384341	111906	3127.51	326.638	2095.37	147.191	639.165	118.032	350.392	57.2652	42.576	4.1497	964.31	117.536	1112.8	170737	4753000	11490	774	10482	64062	47651	296
HNS	Sanya	SY1	2008	A	270815	275002	545817	6184950	128545	3261.04	356.06	2167.46	152.905	745.576	148.017	303.053	50.9906	44.9573	4.14738	1022.81	125.296	1538.8	604606	7330000	11218	888	8070	68047	47947	185
HNS	Sanya	SY1	2009	A	274950	282104	557054	6690565	139054	3706.59	387.432	2707.45	200.051	730.62	145.343	226.437	38.2755	42.083	3.76215	1061.9	130.311	1578	626472	8015100	10977	590	5934	70986	48132	146
HNS	Sanya	SY1	2010	B	282216	287914	570130	7511567	156117	3339.87	344.384	2592.11	192.415	516.427	115.657	195.787	33.1725	35.5435	3.13866	1388.57	172.792	2054.6	569165	9091200	10964	292	5200	70295	48278	73
HNS	Sanya	SY1	2011	B	231200	474300	705500	8584654	178420	3405.72	387.483	2413.81	192.854	712.362	152.525	213.549	36.0338	66.0037	6.06973	1498.46	186.669	1735.2	738930	9109500	13868	479	5657	74849	48351	271
HNS	Sanya	SY1	2012	B	228700	493300	722000	11003807	228698	3817.89	424.966	2941.71	239.635	633.206	149.353	187.46	30.7951	55.5123	5.1831	1617.15	201.684	1796.5	753605	9748805	13868	481	5234	77082	48622	161
HNS	Sanya	SY1	2013	B	220400	511600	732000	12283977	255305	4921.58	527.695	3982.99	328.003	670.429	160.546	205.941	33.3241	62.2153	5.82223	1675.53	209.088	2051.4	757838	12962738	13558	560	6008	79675	48783	244
HNS	Sanya	SY1	2014	B	215400	526500	741900	13527749	281155	4955.85	544.343	3939.35	335.692	707.494	160.95	266.971	43.9024	42.0286	3.79805	1770.93	221.458	974.5	516254	15473654	13525	679	7538	65918	49027	124
HNS	Sanya	SY1	2015	C	209500	539400	748900	14957271	310865	4130.61	488.485	3103.73	268.904	700.986	169.16	283.37	46.5948	42.5263	3.82616	1832.79	229.432	1398.8	507815	15346615	14282	685	8013	41436	49151	46
HNS	Sanya	SY1	2016	C	196900	557400	754300	16372721	340283	4480.05	515.413	3435.26	290.361	667.209	164.947	334.335	56.2388	43.2463	3.86587	1921.66	240.988	1284.5	558256	15317656	14147	703	8953	53362	49197	20
HNS	Sanya	SY1	2017	C	191700	572500	764200	18308345	380513	4849.64	543.529	3861.09	324.51	699.708	174.367	260.434	42.1017	28.4071	2.55081	2007.04	251.936	1976.3	485621	19562921	14696	615	7796	57639	49217	59
HNS	Sanya	SY1	2018	C	186300	587600	773900	20996982	436392	4290.89	494.536	3332.8	281.653	628.228	161.19	314.971	50.4943	14.8861	1.19807	2079.59	261.29	1272.7	690171	15594971	14541	619	10106	62784	49276	23
HNS	Sanya	SY1	2019	C	185800	596700	782500	22865858	475234	3857.22	453.593	3106.99	268.332	574.089	159.43	163.583	24.8495	12.5613	0.981133	2150.29	270.255	1093.2	614826	12888985	14811	478	5590	67450	49299	53
HNS	Sanya	SY1	2020	C	308300	729000	1037300	17551994	364793	3834.72	419.91	3182.29	266.795	562.191	138.873	84.5555	13.6964	5.68143	0.545532	2158.25	269.707	1946.8	656687	14132587	15013	161	2647	74409	49352	22
HNXS	Sansha	SH3	2000	A	0	517	517		0											0.0541306	0.0233425
HNXS	Sansha	SH3	2001	A	0	253	253		0											0.0264894	0.0114229
HNXS	Sansha	SH3	2002	A	0	256	256		0											0.0268035	0.0115584	1211.31
HNXS	Sansha	SH3	2003	A	0	244	244		0											0.0255471	0.0110166	1002.36
HNXS	Sansha	SH3	2004	A	0	244	244		0											0.0255471	0.0110166	834.016
HNXS	Sansha	SH3	2005	A	0	247	247		0											0.0258612	0.011152	1092.59
HNXS	Sansha	SH3	2006	A	0	246	246		0											0.0257565	0.0111069	1133.13
HNXS	Sansha	SH3	2007	A	0	251	251		0											0.02628	0.0113326	1027.83
HNXS	Sansha	SH3	2008	A	0	256	256		0											0.0268035	0.0115584	1197.79
HNXS	Sansha	SH3	2009	A	0	259	259		0											0.0271176	0.0116938	1127.28
HNXS	Sansha	SH3	2010	B	0	242	242		0											0.0253377	0.0109263	1249.6
HNXS	Sansha	SH3	2011	B	0	400	400		0											0.0884571	0.0181648	1006.52
HNXS	Sansha	SH3	2012	B	0	400	400		0											0.0884571	0.0181648	1252.82
HNXS	Sansha	SH3	2013	B	0	400	400		0											0.0884571	0.0181648	1225.56
HNXS	Sansha	SH3	2014	B	0	400	400		0											0.0884571	0.0181648	1150.01
HNXS	Sansha	SH3	2015	C	0	600	600		0											0.118067	0.0241958	1126.97
HNXS	Sansha	SH3	2016	C	0	500	500		0											0.0983894	0.0201631	1346.62
HNXS	Sansha	SH3	2017	C	0	500	500		0											0.0983894	0.0201631	1162.66
HNXS	Sansha	SH3	2018	C	0	500	500		0											0.0983894	0.0201631	1068.26
HNXS	Sansha	SH3	2019	C	0	500	500		0											0.0983894	0.0201631	1124.63
HNXS	Sansha	SH3	2020	C	0	2300	2300		0											0.452591	0.0927505

## Sheet: Abbreviate names
Name	Abbreviate	Annotation	Unit	Note
City		WC:Wenchang,QH:Qionghai,SY:Sanya,SH:Sansha
Region		HNE: Wenchang and Qionghai city located at 19° North Latitude (NL), HNS: Sanya city located at 18°NL, HNXS:Sansha city located at 17°NL.
Time			year
Phase		Time is divided into three phases, A is 2004-2009 year, B is 2009-2014 year and C is 2014-2020 year.
Acanthaster planci	COT		ind/hm2
Acanthaster planci_log	COT_log
Coral reef fish	Fish		ind/100m2
Coral Species	CS	Hard coral species number,representing species diversity	per
Dead coral coverage	DCC		%
Live coral coverage	LCC	Annual coral cover	%
Juvenile coral density	LS	＜5 cm coral subadults	ind/m2
Macroalgae coverage	Macroalgae		%
Chlorophyll a	Chl_a		μg/ L
Chemical oxygen dema	COD		mg/L
DHWmax	DHWmax		℃ ·week
Dissolved oxygen	DO		mg/L
Kd490	Kd490	Turbidity
Salinity	Salinity		‰
Suspended solids	SS		mg/L
Sea surface temperature	SST	Warm season (May-October) mean temperature in remote sensing	℃	SST_warm
Temperature	SST in situ	Instantaneous temperature in situ warm season (May-October)	℃
Typhoon damage coefficient	Typhoon	Typhoon Damage Coefficient
Offshore dstance	OD	Offshore Distance	km
Mangrove area		Annual Mangrove area	hm2
Seagrass coverage		Annual Seagrass coverage	%
Tourist travel		Number of overnight visitors	per
Year Rainfall		Mean annual rainfall	mm
Resident Population	POP	local human resident population	per
Resident Population (T_POP)	T_POP	Number of overnight visitors were converted to resident population per year, denotes local urban development gravity - an indicator of nearby human settlements potential influences on coral reefs (e.g., water quality and land use).	per
Rural POP		Rural resident population	per
Urban POP		Urbanized resident population	per
Real Estate Construction Area		Real estate construction area per year	m2
Construction area		Construction area per year	m2
Mariculture area		Mariculture area per year	hm2
Cultivated land area		Cultivated land area per year	hm2
Forest area		Forest area per year	hm2
Mariculture production		Mariculture production per year	t
Agriculture N	N_agr	Total agricultural nitrogen emissions per year to the local waters	t
Agriculture P	P_agr	Total agricultural phosphorus emissions per year to the local waters	t
N_Crop production		Total nitrogen emissions per year to the local waters from crop production	t
P_Crop production		Total phosphorus emissions per year to the local waters from crop production	t
N_Livestock production		Total nitrogen emissions per year to the local waters from livestock production	t
P_Livestock production		Total phosphorus emissions per year to the local waters from livestock production	t
N_Mariculture		Total nitrogen emissions per year to the local waters from mariculture	t
P_Mariculture		Total phosphorus emissions per year to the local waters from mariculture	t
N_freshwater culture		Total nitrogen emissions per year to the local waters from freshwater culture	t
P_freshwater culture		Total phosphorus emissions per year to the local waters from freshwater culture	t
N_Human consumption		Total nitrogen emissions per year to the local waters from human consumption	t
P_Human consumption		Total phosphorus emissions per year to the local waters from human consumption	t
