# Supplementary material for: Local over Global: Anthropogenic Stressors Outpace Climate Impacts on Coral Reef Collapse in the South China Sea
Source: Research Square preprint supplement (doi:10.21203/rs.3.rs-6545472/v1), 2025-06-20
Supplement: Supplementary file 2 [file d42969097013d4679ed3d659.xlsx]

## Sheet: Abbreviate names
Name	Abbreviate	Annotation	Unit	Note
City		WC:Wenchang,QH:Qionghai,SY:Sanya,SH:Sansha
Region		HNE: Wenchang and Qionghai city located at 19° North Latitude (NL), HNS: Sanya city located at 18°NL, HNXS:Sansha city located at 17°NL.
Time			year
Phase		Time is divided into three phases, A is 2004-2009 year, B is 2009-2014 year and C is 2014-2020 year.
Acanthaster planci	COT		ind/hm2
Acanthaster planci_log	COT_log
Coral reef fish	Fish		ind/100m2
Coral Species	CS	Hard coral species number,representing species diversity	per
Dead coral coverage	DCC		%
Live coral coverage	LCC	Annual coral cover	%
Juvenile coral density	LS	＜5 cm coral subadults	ind/m2
Macroalgae coverage	Macroalgae		%
Chlorophyll a	Chl_a		μg/ L
Chemical oxygen dema	COD		mg/L
DHWmax	DHWmax		℃ ·week
Dissolved oxygen	DO		mg/L
Kd490	Kd490	Turbidity
Salinity	Salinity		‰
Suspended solids	SS		mg/L
Sea surface temperature	SST	Warm season (May-October) mean temperature in remote sensing	℃	SST_warm
Temperature	SST in situ	Instantaneous temperature in situ warm season (May-October)	℃
Typhoon damage coefficient	Typhoon	Typhoon Damage Coefficient
Offshore dstance	OD	Offshore Distance	km
Mangrove area		Annual Mangrove area	hm2
Seagrass coverage		Annual Seagrass coverage	%
Tourist travel		Number of overnight visitors	per
Year Rainfall		Mean annual rainfall	mm
Resident Population	POP	local human resident population	per
Resident Population (T_POP)	T_POP	Number of overnight visitors were converted to resident population per year, denotes local urban development gravity - an indicator of nearby human settlements potential influences on coral reefs (e.g., water quality and land use).	per
Rural POP		Rural resident population	per
Urban POP		Urbanized resident population	per
Real Estate Construction Area		Real estate construction area per year	m2
Construction area		Construction area per year	m2
Mariculture area		Mariculture area per year	hm2
Cultivated land area		Cultivated land area per year	hm2
Forest area		Forest area per year	hm2
Mariculture production		Mariculture production per year	t
Agriculture N	N_agr	Total agricultural nitrogen emissions per year to the local waters	t
Agriculture P	P_agr	Total agricultural phosphorus emissions per year to the local waters	t
N_Crop production		Total nitrogen emissions per year to the local waters from crop production	t
P_Crop production		Total phosphorus emissions per year to the local waters from crop production	t
N_Livestock production		Total nitrogen emissions per year to the local waters from livestock production	t
P_Livestock production		Total phosphorus emissions per year to the local waters from livestock production	t
N_Mariculture		Total nitrogen emissions per year to the local waters from mariculture	t
P_Mariculture		Total phosphorus emissions per year to the local waters from mariculture	t
N_freshwater culture		Total nitrogen emissions per year to the local waters from freshwater culture	t
P_freshwater culture		Total phosphorus emissions per year to the local waters from freshwater culture	t
N_Human consumption		Total nitrogen emissions per year to the local waters from human consumption	t
P_Human consumption		Total phosphorus emissions per year to the local waters from human consumption	t

## Sheet: analysis commmunity
Region	city	Site	Time	Offshore Distance	Phase	Live coral coverage	Coral reef fish	Macroalgae	Dead coral coverage	Coral Species	CoTS	CoTS log	MC_LCC
HNE	Qionghai	QH1	2004	0.51	A	7.93	10		37.25	17			0
HNE	Qionghai	QH1	2005	0.51	A
HNE	Qionghai	QH1	2006	0.51	A	15.69	25		0.88	28			0
HNE	Qionghai	QH1	2007	0.51	A	26.96		0	2.58	38	50	1.69897	0
HNE	Qionghai	QH1	2008	0.51	A	26.85	19	0	1.46	17			0
HNE	Qionghai	QH1	2009	0.51	A	12.93	19	4	0	29			0.309358
HNE	Qionghai	QH1	2010	0.51	B	11	19	30	16	20			2.72727
HNE	Qionghai	QH1	2011	0.51	B	13	16	40	3	20			3.07692
HNE	Qionghai	QH1	2012	0.51	B	11	21	38	1	20			3.45455
HNE	Qionghai	QH1	2013	0.51	B	6.5	25	48	0	20			7.38462
HNE	Qionghai	QH1	2014	0.51	B	4.5	22	1	0	18			0.222222
HNE	Qionghai	QH1	2015	0.51	C	4	29.5	37.4286	0	15			9.35714
HNE	Qionghai	QH1	2016	0.51	C	4.5	40	42.4286	0	15			9.42857
HNE	Qionghai	QH1	2017	0.51	C	4	40	34	0	14			8.5
HNE	Qionghai	QH1	2018	0.51	C	3	13.5	22.5	0	13			7.5
HNE	Qionghai	QH1	2019	0.51	C	3.5	13.5	32.5	0	17			9.28571
HNE	Qionghai	QH1	2020	0.51	C	4.5	10.5	57	0	8			12.6667
HNE	Wenchang	WC1	2004	0.42	A	8.7	15	0	17.17	14			0
HNE	Wenchang	WC1	2005	0.42	A
HNE	Wenchang	WC1	2006	0.42	A	26	27		3.21	37			0
HNE	Wenchang	WC1	2007	0.42	A	25.95		0	1.7	39			0
HNE	Wenchang	WC1	2008	0.42	A	23.25	18	0	0.86	18			0
HNE	Wenchang	WC1	2009	0.42	A	12	18	2	0	39			0.166667
HNE	Wenchang	WC1	2010	0.42	B	14.75	18	1	0	24			0.0677966
HNE	Wenchang	WC1	2011	0.42	B	20.3	10	0	0.5	24			0
HNE	Wenchang	WC1	2012	0.42	B	21.5	22	2	0.1	24			0.0930233
HNE	Wenchang	WC1	2013	0.42	B	21.5	9.5	1	0.4	24			0.0465116
HNE	Wenchang	WC1	2014	0.42	B	21	20	2	0	23			0.0952381
HNE	Wenchang	WC1	2015	0.42	C	31	69	1.33333	0	25			0.0430108
HNE	Wenchang	WC1	2016	0.42	C	27.5	34.5	6.33333	0	26			0.230303
HNE	Wenchang	WC1	2017	0.42	C	17.5	34.5	0	0	24			0
HNE	Wenchang	WC1	2018	0.42	C	14	47.5	0	0	24			0
HNE	Wenchang	WC1	2019	0.42	C	20.05	51	3.33333	0	60			0.166251
HNE	Wenchang	WC1	2020	0.42	C	25	52.5	0	0	58			0
HNE	Wenchang	WC2	2006	2.29	A	51.58	66	0	2.13	27			0
HNE	Wenchang	WC2	2007	2.29	A	41		0	3.6	26			0
HNE	Wenchang	WC2	2008	2.29	A	38.75	21	0	0	22			0
HNE	Wenchang	WC2	2009	2.29	A	29.6	39	8	0	34			0.27027
HNE	Wenchang	WC2	2010	2.29	B	13.83	21	39	1.5	16			2.81996
HNE	Wenchang	WC2	2011	2.29	B	16.3	15	45	4.25	16			2.76074
HNE	Wenchang	WC2	2012	2.29	B	9	41.5	45	0.25	16			5
HNE	Wenchang	WC2	2013	2.29	B	14.5	19	54	0.6	16			3.72414
HNE	Wenchang	WC2	2014	2.29	B	7	12	1	0	16			0.142857
HNE	Wenchang	WC2	2015	2.29	C	4	31	25.5	0	14			6.375
HNE	Wenchang	WC2	2016	2.29	C	6	28	79	0	14			13.1667
HNE	Wenchang	WC2	2017	2.29	C	4	28	1.5	0	13			0.375
HNE	Wenchang	WC2	2018	2.29	C	3	10.5	15.5	0	11			5.16667
HNE	Wenchang	WC2	2019	2.29	C	6.5	9.5	22.6667	0	22			3.48718
HNE	Wenchang	WC2	2020	2.29	C	7.5	11	52.5	0	8			7
HNS	Sanya	SY1	2002	0.11	A	50.5							0
HNS	Sanya	SY1	2004	0.11	A	26.4	52						0
HNS	Sanya	SY1	2005	0.11	A	18.4			0.4	21			0
HNS	Sanya	SY1	2006	0.11	A	27.43	58		2.75	22			0
HNS	Sanya	SY1	2007	0.11	A	40.85	42	0	2.63	35	300	2.47712	0
HNS	Sanya	SY1	2008	0.11	A	21.63	40	0	0	15			0
HNS	Sanya	SY1	2009	0.11	A	28.3	65	0	0	34	200	2.30103	0
HNS	Sanya	SY1	2010	0.11	B	11.1	34	5	0	24			0.45045
HNS	Sanya	SY1	2011	0.11	B	24.9	21	4	3.75	24			0.160643
HNS	Sanya	SY1	2012	0.11	B	6	18	4	0	19			0.666667
HNS	Sanya	SY1	2013	0.11	B	6	45	3	0.2	20			0.5
HNS	Sanya	SY1	2014	0.11	B	3	9	0	0	11			0
HNS	Sanya	SY1	2015	0.11	C	1.5	31.5	1.85714	0	11			1.2381
HNS	Sanya	SY1	2016	0.11	C	3.5	37	2.6	0	11			0.742857
HNS	Sanya	SY1	2017	0.11	C	3.5	37	3.5	0	13			1
HNS	Sanya	SY1	2018	0.11	C	3	12	4	0	11			1.33333
HNS	Sanya	SY1	2019	0.11	C	4.5	45	20.5	0	18			4.55556
HNS	Sanya	SY1	2020	0.11	C	4	25	4.5	0	18			1.125
HNS	Sanya	SY2	2002	0.1	A	30							0
HNS	Sanya	SY2	2004	0.1	A	23.18	48		27.84	33			0
HNS	Sanya	SY2	2005	0.1	A	12.84	35		16.55	14			0
HNS	Sanya	SY2	2006	0.1	A	15.7			6.35	24			0
HNS	Sanya	SY2	2007	0.1	A	23.38	48	0	0.17	70			0
HNS	Sanya	SY2	2008	0.1	A	20.9	51	0	0	20			0
HNS	Sanya	SY2	2009	0.1	A	25.2	128	4	0	35			0.15873
HNS	Sanya	SY2	2010	0.1	B	18.25	90	3	0	16			0.164384
HNS	Sanya	SY2	2011	0.1	B	18.8	40	7	1.25	16			0.37234
HNS	Sanya	SY2	2012	0.1	B	19	17.5	3	0.25	16			0.157895
HNS	Sanya	SY2	2013	0.1	B	25.5	18	7	2	16			0.27451
HNS	Sanya	SY2	2014	0.1	B	24.5	26	2	0	32			0.0816327
HNS	Sanya	SY2	2015	0.1	C	24.5	183	0	0	32			0
HNS	Sanya	SY2	2016	0.1	C	25	76	2.33333	0	34			0.0933333
HNS	Sanya	SY2	2017	0.1	C	25	32.5	0	0	34			0
HNS	Sanya	SY2	2018	0.1	C	21	21	0	0	34			0
HNS	Sanya	SY2	2019	0.1	C	24	112	0	2.5	59			0
HNS	Sanya	SY2	2020	0.1	C	23.5	38	0	0	54			0
HNS	Sanya	SY3	2004	3.01	A	35.92	38		1.58	19			0
HNS	Sanya	SY3	2005	3.01	A	41.9			3.45	27			0
HNS	Sanya	SY3	2006	3.01	A	48.24	191		4.86	46			0
HNS	Sanya	SY3	2007	3.01	A	80	160	0	5.17	49			0
HNS	Sanya	SY3	2008	3.01	A	72.45	183	0	0	28			0
HNS	Sanya	SY3	2009	3.01	A	54.1	168	0	0	47	700	2.8451	0
HNS	Sanya	SY3	2010	3.01	B	36.5	153	0	0	42			0
HNS	Sanya	SY3	2011	3.01	B	43	78	0	0.8	42			0
HNS	Sanya	SY3	2012	3.01	B	38.5	181	0	0.85	42			0
HNS	Sanya	SY3	2013	3.01	B	31	105.5	0	0.5	42			0
HNS	Sanya	SY3	2014	3.01	B	34.3	196	0	0	42			0
HNS	Sanya	SY3	2015	3.01	C	31.5	154	0	0	41			0
HNS	Sanya	SY3	2016	3.01	C	26.5	138	0	0	41			0
HNS	Sanya	SY3	2017	3.01	C	24.5	110	0.666667	0	40			0.0272109
HNS	Sanya	SY3	2018	3.01	C	21.5	97.5	0	0	40			0
HNS	Sanya	SY3	2019	3.01	C	21.5	99	0	0	63			0
HNS	Sanya	SY3	2020	3.01	C	30	102	0	0	62			0
HNS	Sanya	SY4	2002	6.7	A	66.54							0
HNS	Sanya	SY4	2004	6.7	A
HNS	Sanya	SY4	2005	6.7	A	20.85			0	18			0
HNS	Sanya	SY4	2006	6.7	A	47.31	92		4.81	36			0
HNS	Sanya	SY4	2007	6.7	A	55.17	40	0	1.17	65			0
HNS	Sanya	SY4	2008	6.7	A	35.35	35	0	0	15			0
HNS	Sanya	SY4	2009	6.7	A	35.9	62	0	0	35			0
HNS	Sanya	SY4	2010	6.7	B	23.13	35	0	1.13	19			0
HNS	Sanya	SY4	2011	6.7	B	24.3	33	6	1.13	19	200	2.30103	0.246914
HNS	Sanya	SY4	2012	6.7	B	21	27.5	5	1.5	19			0.238095
HNS	Sanya	SY4	2013	6.7	B	24	22.5	5	0.25	19			0.208333
HNS	Sanya	SY4	2014	6.7	B	32	40	1	0	19			0.03125
HNS	Sanya	SY4	2015	6.7	C	22.5	79	0.5	0	22			0.0222222
HNS	Sanya	SY4	2016	6.7	C	19.5	84	3.5	0	32			0.179487
HNS	Sanya	SY4	2017	6.7	C	15	22	4.2	0	31			0.28
HNS	Sanya	SY4	2018	6.7	C	14.5	25.5	4	0	31			0.275862
HNS	Sanya	SY4	2019	6.7	C	13	58.5	4.5	0	54			0.346154
HNS	Sanya	SY4	2020	6.7	C	14	43	2.5	0	48			0.178571
HNS	Sanya	SY5	2002	0.29	A	30							0
HNS	Sanya	SY5	2004	0.29	A
HNS	Sanya	SY5	2005	0.29	A	43.03			0.4	22			0
HNS	Sanya	SY5	2006	0.29	A	47.5			2.75	21			0
HNS	Sanya	SY5	2007	0.29	A	40.54	45	0	9.46	48	300	2.47712	0
HNS	Sanya	SY5	2008	0.29	A	43.38	67	0	0	25	300	2.47712	0
HNS	Sanya	SY5	2009	0.29	A	42	60	1	0	48			0.0238095
HNS	Sanya	SY5	2010	0.29	B	30.75	59	9	0	34			0.292683
HNS	Sanya	SY5	2011	0.29	B	14.9	28	13	4.75	34			0.872483
HNS	Sanya	SY5	2012	0.29	B	5.25	39	11	2.5	33			2.09524
HNS	Sanya	SY5	2013	0.29	B	7.5	25.5	8	0.25	33			1.06667
HNS	Sanya	SY5	2014	0.29	B	1.5	40.5	2	0	16			1.33333
HNS	Sanya	SY5	2015	0.29	C	3	40.5	4.85	0	16			1.61667
HNS	Sanya	SY5	2016	0.29	C	4	36.5	1.5	0	17			0.375
HNS	Sanya	SY5	2017	0.29	C	7.5	36.5	1.6	0	17			0.213333
HNS	Sanya	SY5	2018	0.29	C	4	14.5	3.5	0	12			0.875
HNS	Sanya	SY5	2019	0.29	C	8	53	4.66667	0	36			0.583333
HNS	Sanya	SY5	2020	0.29	C	13	31.5	5.33333	0	34			0.410256
HNS	Sanya	SY6	2004	0.63	A	56.8							0
HNS	Sanya	SY6	2005	0.63	A	35.67			3.4	26			0
HNS	Sanya	SY6	2006	0.63	A	77.21	364		12.67	42			0
HNS	Sanya	SY6	2007	0.63	A	66.05	120	0	20.04	45	1200	3.07918	0
HNS	Sanya	SY6	2008	0.63	A	35.38	93	0	3.61	9			0
HNS	Sanya	SY6	2009	0.63	A	35.1	53	0	39.45	45	400	2.60206	0
HNS	Sanya	SY6	2010	0.63	B	29.9	45	0	3.87	31			0
HNS	Sanya	SY6	2011	0.63	B	28.1	53	0	0.75	31			0
HNS	Sanya	SY6	2012	0.63	B	29.5	133	0	0.75	31			0
HNS	Sanya	SY6	2013	0.63	B	29.5	148.5	0	0.5	31			0
HNS	Sanya	SY6	2014	0.63	B	5.5	80.5	0	0	18			0
HNS	Sanya	SY6	2015	0.63	C	24	80.5	0	0	24			0
HNS	Sanya	SY6	2016	0.63	C	22	91	0	0	26			0
HNS	Sanya	SY6	2017	0.63	C	22	91	0	0	28			0
HNS	Sanya	SY6	2018	0.63	C	20	62	0	0	28			0
HNS	Sanya	SY6	2019	0.63	C	19.5	72	0	0	58			0
HNS	Sanya	SY6	2020	0.63	C	21	71.5	0	0	50			0
HNXS	Sansha	SH1	2005	324	A	63.5	300	0	8.75	13	0		0
HNXS	Sansha	SH1	2006	324	A	49.25	148	0	24.71	38	2100	3.32222	0
HNXS	Sansha	SH1	2007	324	A	88.17	240	0	6.17	23	22800	4.35793	0
HNXS	Sansha	SH1	2008	324	A	2.33	194	0	76	23	1200	3.07918	0
HNXS	Sansha	SH1	2009	324	A	1.5	114	0	80	4	2200	3.34242	0
HNXS	Sansha	SH1	2010	324	B	6	89	0	0	5			0
HNXS	Sansha	SH1	2011	324	B	2.4	73	3.88	0	6			1.61667
HNXS	Sansha	SH1	2012	324	B	2.63	96	3.81	0	6			1.44867
HNXS	Sansha	SH1	2013	324	B	6.15	105	0.003	0	30			0.000487805
HNXS	Sansha	SH1	2014	324	B	3.75	105	0	1.25	17			0
HNXS	Sansha	SH1	2015	324	C	5.5	123	0.5	0	17			0.0909091
HNXS	Sansha	SH1	2016	324	C	7.5	83	0	0	17			0
HNXS	Sansha	SH1	2017	324	C	4	64	0	0	18			0
HNXS	Sansha	SH1	2018	324	C	3	49.55	0	2.25	13			0
HNXS	Sansha	SH1	2019	324	C	6.75	63.25	0	2.25	58			0
HNXS	Sansha	SH1	2020	324	C	12.5	83	0	0	65			0
HNXS	Sansha	SH2	2005	312	A	64.67	235	0	4.75	20	400	2.60206	0
HNXS	Sansha	SH2	2006	312	A	68.67	317	0	14.5	60	4800	3.68124	0
HNXS	Sansha	SH2	2007	312	A	11	280	0	78.17	51	36400	4.5611	0
HNXS	Sansha	SH2	2008	312	A	1.8	140	0	66	51	800	2.90309	0
HNXS	Sansha	SH2	2009	312	A	0.58	54	0	61.02	3	1200	3.07918	0
HNXS	Sansha	SH2	2010	312	B	3.5	140	0	0	3			0
HNXS	Sansha	SH2	2011	312	B	1.7	171	0	0	5			0
HNXS	Sansha	SH2	2012	312	B	1.95	147	0	0	5			0
HNXS	Sansha	SH2	2013	312	B	8.1	85	0.002	0	39			0.000246914
HNXS	Sansha	SH2	2014	312	B	1.75	69	0	0	12			0
HNXS	Sansha	SH2	2015	312	C	1.15	87	0	0	12			0
HNXS	Sansha	SH2	2016	312	C	7	112	0	0	15			0
HNXS	Sansha	SH2	2017	312	C	5.5	58	0	0	15			0
HNXS	Sansha	SH2	2018	312	C	6	35.41	0	5.75	14			0
HNXS	Sansha	SH2	2019	312	C	7.5	65.25	0	3	60			0
HNXS	Sansha	SH2	2020	312	C	14.25	95.25	0	0	45			0
HNXS	Sansha	SH3	2005	333.36	A	76.34	190	0	16	22	0	-3	0
HNXS	Sansha	SH3	2006	333.36	A	69.5	192	0	3.33	47	0	1	0
HNXS	Sansha	SH3	2007	333.36	A	46.67	160	0	4.33	39	1600	3.20412	0
HNXS	Sansha	SH3	2008	333.36	A	51.4	146	0	44.6	39	45600	4.65896	0
HNXS	Sansha	SH3	2009	333.36	A	24.5	118	0	55.54	47	92500	4.96614	0
HNXS	Sansha	SH3	2010	333.36	B	25.5	145	0	0	35			0
HNXS	Sansha	SH3	2011	333.36	B	1.97	170	11.03	0	24			5.59898
HNXS	Sansha	SH3	2012	333.36	B	1.79	154	9.2	0	24			5.13966
HNXS	Sansha	SH3	2013	333.36	B	6.67	160	0.067	0	24			0.010045
HNXS	Sansha	SH3	2014	333.36	B	6.4	119	0	0	21			0
HNXS	Sansha	SH3	2015	333.36	C	3	369	27	0	21			9
HNXS	Sansha	SH3	2016	333.36	C	5	136	3	0	18			0.6
HNXS	Sansha	SH3	2017	333.36	C	3	110	21	0	9			7
HNXS	Sansha	SH3	2018	333.36	C	2	80	10	2	5			5
HNXS	Sansha	SH3	2019	333.36	C	4	151	3	0	42			0.75
HNXS	Sansha	SH3	2020	333.36	C	9	248	0	0	32			0
HNXS	Sansha	SH4	2005	319	A	53.83	285	0	2.33	10	400	2.60206	0
HNXS	Sansha	SH4	2006	319	A	76.67	252	0	6.5	52	1600	3.20412	0
HNXS	Sansha	SH4	2007	319	A	40.17	220	0	26.17	46	4400	3.64345	0
HNXS	Sansha	SH4	2008	319	A	2.5	124	0	77.33	46	32400	4.51055	0
HNXS	Sansha	SH4	2009	319	A	1.85	110	0	68.82	5	8700	3.93952	0
HNXS	Sansha	SH4	2010	319	B	11.5	124	0	0	14			0
HNXS	Sansha	SH4	2011	319	B	3.15	253	0	0	9			0
HNXS	Sansha	SH4	2012	319	B	3.1	129	0	0	9			0
HNXS	Sansha	SH4	2013	319	B	1.69	143	0	0	35			0
HNXS	Sansha	SH4	2014	319	B	6.25	67	0	1	15			0
HNXS	Sansha	SH4	2015	319	C	1.5	101	0	0	15			0
HNXS	Sansha	SH4	2016	319	C	2.25	97	0	0	12			0
HNXS	Sansha	SH4	2017	319	C	4	49	0	0	13			0
HNXS	Sansha	SH4	2018	319	C	5.5	51.61	0	3.5	12			0
HNXS	Sansha	SH4	2019	319	C	5.5	77	0	3.5	59			0
HNXS	Sansha	SH4	2020	319	C	21.25	100.75	0	5.25	54			0

## Sheet: analysis envi
Region	city	Site	Time	Offshore Distance	Phase	Typhoon	SST_warm	DHWmax	Kd490	Chla RS	PAR_warm	Year Rainfall	Salinity	SST in situ	Suspended solids	DO	COD	Chl_a	Phosphate	Nitrite	Nitrate	Ammonium Salt	Inorganic nitrogen_N	N_P
HNE	Qionghai	QH1	2004	0.51	A	0	28.8817	1.66	0.0995667	0.964984	44.874	1074.63	33.2265	26.25	3.3	6.085		0.47	0.005	0.00165	0.027	0.0225	0.05115	10.23
HNE	Qionghai	QH1	2005	0.51	A	0.25	28.57	0	0.198036	2.24566	43.8836	1607.05	34.281		2.3				0.005				0.04	8
HNE	Qionghai	QH1	2006	0.51	A	0	28.9733	1.11	0.0913778	0.750337	43.5463	1472.44	34.04	24.85	2.3	7.02667		0.02	0.018	0.002	0.00766667	0.0286667	0.0383333	2.12963
HNE	Qionghai	QH1	2007	0.51	A	0	28.8617	0	0.1383	1.59661	44.2183	1440.13	33.3433	28.1567	5.63333	5.20333		0.0733333	0.0025	0.00166667	0.012	0.0236667	0.0373333	14.9333
HNE	Qionghai	QH1	2008	0.51	A	0	28.7967	2.58	0.135217	1.42098	43.516	1907.16	33.5333		2.66667	6.22333			0.00233333	0.0015	0.014	0.0556667	0.0711667	30.5
HNE	Qionghai	QH1	2009	0.51	A	0.05	29.4133	2.59	0.109583	1.14375	42.9603	2163.29	31.9367	27.79	2.95	6.35667	0.283333	0.173333
HNE	Qionghai	QH1	2010	0.51	B	0	28.7383	0.31	0.124033	1.37046	43.2327	2189.97	33.1433	27.5667	2.13333	5.43667	0.39	0.123333
HNE	Qionghai	QH1	2011	0.51	B	0	28.7517	2.32	0.0991333	1.05591	45.2207	1609.33	33.8717	26.7067		6.32	0.353333	0.14	0.00166667	0.00166667	0.0203333	0.02	0.042	25.2
HNE	Qionghai	QH1	2012	0.51	B	0	29.0683	0.35	0.1302	1.47123	44.0876	1698.9	31.8733	29.1333		6.25	0.393333	0.506667	0.001	0.00133333	0.025	0.0376667	0.064	64
HNE	Qionghai	QH1	2013	0.51	B	0.29	28.7783	0	0.138527	1.81066	41.8113	1948.15	33.1833	29.1333		5.75333	0.473333	0.1	0.003	0.00266667	0.0383333	0.0236667	0.0646667	21.5556
HNE	Qionghai	QH1	2014	0.51	B	0	29.4617	2.78	0.12935	1.42149	45.731	1823.71	34.1457	25.4167	6.4	6.24333	0.38	0.236667	0.0025	0.002	0.0136667	0.0286667	0.0443333	17.7333
HNE	Qionghai	QH1	2015	0.51	C	0	29.125	1.46	0.148517	1.77046	47.7383	1236.9	33.226	25.2333	4.3	6.21	0.563333	0.39	0.003	0.002	0.0116667	0.0136667	0.0273333	9.11111
HNE	Qionghai	QH1	2016	0.51	C	0	29.3133	0.95	0.196133	2.47851	45.07	1965.39	33.414	29.6667	14.2333	5.17	0.296667	0.123333	0.00133333	0.00166667	0.0353333	0.026	0.063	47.25
HNE	Qionghai	QH1	2017	0.51	C	0	29.865	6.95	0.128117	1.462	44.677	1921.76	32.529	30.7667	5.96667	5.80667	0.5	0.0433333	0.01	0.00533333	0.0346667	0.0243333	0.0643333	6.43333
HNE	Qionghai	QH1	2018	0.51	C	0	29.0017	0.79	0.1026	1.05674	44.9687	1602.49	31.241	29.7333		6.38	0.66	0.0966667	0.00566667	0.0035	0.059	0.0666667	0.129167	22.7941
HNE	Qionghai	QH1	2019	0.51	C	0	29.4117	0.66	0.122033	1.32881	47.235	1836.62	32.5912		8.83	4.91	0.575	0.69	0.0025	0.0418	0.0012	0.004	0.047	18.8
HNE	Qionghai	QH1	2020	0.51	C	0.25	29.8067	11.3	0.115633	1.09917	45.3873
HNE	Wenchang	WC1	2004	0.42	A	0	28.8917	2.23	0.0781	0.637796	46.333	965.9	33.5535	25.65	5.7	6.74		0.28	0.013	0.0075	0.0175	0.015	0.04	3.07692
HNE	Wenchang	WC1	2005	0.42	A	0	28.6783	0	0.0885636	0.790064	45.476	1221.96
HNE	Wenchang	WC1	2006	0.42	A	0.05	28.88	1.05	0.0944222	0.76852	43.631	1274.1	34.41	26.3067	2	6.47667		0.0266667		0.001	0.007	0.032	0.04
HNE	Wenchang	WC1	2007	0.42	A	0.05	28.8717	0.14	0.100567	1.08779	43.3923	1215.72	33.1533	28.1667	3.16667	6.32		0.166667	0.002	0.002	0.0146667	0.0246667	0.0413333	20.6667
HNE	Wenchang	WC1	2008	0.42	A	0.25	28.6133	2.89	0.0986667	1.00984	45.046	1649.32	34.2		2.9	5.95667			0.002	0.001	0.011	0.0193333	0.0313333	15.6667
HNE	Wenchang	WC1	2009	0.42	A	0.0975	29.0517	2.25	0.101933	0.970531	43.9343	1673.52	32.4133	28.7433	2.63333	6.70333	0.286667	0.0833333
HNE	Wenchang	WC1	2010	0.42	B	0	28.7	0.3	0.120617	1.31216	42.907	1668.89	33.8333	27.5333	3.06667	6.53	0.36	0.193333
HNE	Wenchang	WC1	2011	0.42	B	0.7325	28.5767	1.56	0.0966667	1.06606	44.5813	1379.83	33.1727	28.2167		7.39333	0.366667	0.0966667	0.00133333	0.002	0.0136667	0.017	0.0326667	24.5
HNE	Wenchang	WC1	2012	0.42	B	0	29.0567	0.33	0.130717	1.46762	45.1248	1510.79	33.9067	27.8667		6.85333	0.22	0.226667	0.001		0.0246667	0.0566667	0.0813333	81.3333
HNE	Wenchang	WC1	2013	0.42	B	0	28.6883	0	0.103236	1.24355	42.5237	1598.54	33.46	28.2667		6.29667	0.356667	0.243333	0.001	0.00233333	0.031	0.0223333	0.0556667	55.6667
HNE	Wenchang	WC1	2014	0.42	B	0.98	29.4017	2.89	0.0925833	0.879246	46.0743	1465.36	34.0033	26.5	6.5	6.42667	0.29	0.193333	0.003	0.002	0.022	0.037	0.061	20.3333
HNE	Wenchang	WC1	2015	0.42	C	0	29.2567	1.28	0.1382	1.63364	47.81	1259.22	34.1707	26.1	4.03333	6.88333	0.24	0.03	0.002	0	0.0166667	0.0243333	0.041	20.5
HNE	Wenchang	WC1	2016	0.42	C	0	29.295	1.13	0.13	1.53095	45.4597	1613.8	33.704	30.1	7.5	6.34	0.243333	0.0733333	0.001	0.001	0.00333333	0.0213333	0.0256667	25.6667
HNE	Wenchang	WC1	2017	0.42	C	0.05	29.5683	5.46	0.131467	1.52326	43.9797	1539.96	33.2967	30.1667	8.53333	6.53333	0.44	0.136667	0.00133333	0	0.0116667	0.00733333	0.019	14.25
HNE	Wenchang	WC1	2018	0.42	C	0.05	29.04	0.65	0.106083	1.05727	43.439	1434.16	31.442	29.8667		6.35333	0.646667	0.35	0.001		0.039	0.0736667	0.112667	112.667
HNE	Wenchang	WC1	2019	0.42	C	0.05	29.315	0.96	0.111717	1.15419	45.7707	1458.62	33.9267		9.79	7	0.545		0.001	0.033	0.00035	0.0055	0.03885	38.85
HNE	Wenchang	WC1	2020	0.42	C	0	29.3617	6.59	0.0891833	0.850028	44.3983
HNE	Wenchang	WC2	2006	2.29	A	0.05	28.99	1.19	0.116222	1.23402	43.2553	1274.1	34.5	30.4867	1.83333	6.61333		0.06	0.00366667	0.003		0.0623333	0.0653333	17.8182
HNE	Wenchang	WC2	2007	2.29	A	0.05	28.9417	0	0.120467	1.35265	44.2097	1215.72	31.9067	29.4733	3.36667	6.66		0.296667	0.001	0.00133333	0.0153333	0.0286667	0.0453333	45.3333
HNE	Wenchang	WC2	2008	2.29	A	0.25	28.805	2.62	0.138617	1.55494	44.357	1649.32	34.16		4.533	6.757		0.203333	0.003	0.002	0.0253333	0.0203333	0.0476667	15.8889
HNE	Wenchang	WC2	2009	2.29	A	0.0975	29.385	2.16	0.141033	1.70138	43.7703	1673.52	32.6233	29.0533	5.56667	7.81	0.24	0.116667
HNE	Wenchang	WC2	2010	2.29	B	0	28.7267	0.33	0.1168	1.23353	43.891	1668.89	33.8033	26.7667	4.86667	6.66333	0.363333	0.103333
HNE	Wenchang	WC2	2011	2.29	B	0.7325	28.7467	2.14	0.105617	1.19416	45.4867	1379.83	33.8077	27.4667		6.82333	0.273333	0.1	0.00233333	0.00166667	0.017	0.019	0.0376667	16.1429
HNE	Wenchang	WC2	2012	2.29	B	0	29.0967	0.33	0.154833	1.89455	45.3664	1510.79	32.852	28		6.82667	0.296667	0.206667	0.0015		0.0246667	0.0153333	0.04	26.6667
HNE	Wenchang	WC2	2013	2.29	B	0	28.8233	0	0.139964	1.89941	42.2247	1598.54	32.41	29.1667		7.06667	0.403333	0.163333	0.001	0.001	0.0253333	0.0223333	0.0486667	48.6667
HNE	Wenchang	WC2	2014	2.29	B	0.98	29.4033	2.94	0.116517	1.28175	45.8263	1465.36	33.5567	27.3333	5.9	6.88	0.41	0.173333	0.00266667	0.001	0.011	0.0316667	0.0436667	16.375
HNE	Wenchang	WC2	2015	2.29	C	0	29.2267	1.26	0.16795	2.04975	46.4653	1259.22	34.063	25.4667	3.8	6.53333	0.336667	0.0666667	0.00466667	0.00266667	0.0326667	0.027	0.0623333	13.3571
HNE	Wenchang	WC2	2016	2.29	C	0	29.425	1.42	0.1611	1.98031	45.3097	1613.8	34.0367	31.3667	2.06667	4.64333	0.48	0.0566667	0.00233333	0.00166667	0.0293333	0.033	0.064	27.4286
HNE	Wenchang	WC2	2017	2.29	C	0.05	29.8733	7	0.13605	1.59102	44.423	1539.96	32.4133	30.3667	6.36667	6.15	0.843333	0.45	0.00166667	0.001	0.007	0.0103333	0.0183333	11
HNE	Wenchang	WC2	2018	2.29	C	0.05	29.0967	1.18	0.12545	1.39031	43.562	1434.16	31.2247	29.3		6.42333	0.65	0.146667	0.00133333	0.002	0.0483333	0.0663333	0.116667	87.5
HNE	Wenchang	WC2	2019	2.29	C	0.05	29.425	0.68	0.169383	2.14405	46.509	1458.62	30.3353			7.225	0.75		0.005	0.05605	0.0019	0.0215	0.07945	15.89
HNE	Wenchang	WC2	2020	2.29	C	0	29.7717	10.19	0.132867	1.63171	44.709
HNS	Sanya	SY1	2002	0.11	A	0.25	29.47	2.43	0.09244	1.0163	42.3955	1347.22
HNS	Sanya	SY1	2004	0.11	A	0	29.535	1.23	0.0875	0.83842	46.5757	916.483	31.794	28.5	19.45	7.155			0.0114	0.0044	0.01095	0.05375	0.0691	6.0614
HNS	Sanya	SY1	2005	0.11	A	0	29.305	0.47	0.0933455	0.888332	41.1744	1434.23	34.52	28.59	1.05	6.29		0.14	0.0145	0.0013	0.0315	0.0197	0.0525	3.62069
HNS	Sanya	SY1	2006	0.11	A	0	29.37	2.02	0.0842889	0.720383	46.363	1013.57	34.57	27.81	0.7	7.4			0.007		0.035	0.04	0.075	10.7143
HNS	Sanya	SY1	2007	0.11	A	0.25	29.6283	3.12	0.0860667	0.789029	46.33	1074.75	33.85	27.64	2.3	6.52		0.07	0.002	0.002	0.013	0.025	0.04	20
HNS	Sanya	SY1	2008	0.11	A	0	29.3783	1.19	0.10165	1.09363	42.5863	1417.55	33.86		12.4	6.04		0.06	0.003		0.025	0.04	0.065	21.6667
HNS	Sanya	SY1	2009	0.11	A	0.05	29.6783	2.43	0.0874	0.816097	45.4243	1454.77	33.15	28.06	5.9	6.62	0.26	0.1
HNS	Sanya	SY1	2010	0.11	B	0.65	29.875	3.25	0.0941167	0.912216	44.026	1700.22	33.74	26.8	24.9	6.15	0.13	0.07
HNS	Sanya	SY1	2011	0.11	B	0	29.46	1.8	0.0864333	0.871002	45.2873	1425.91	33.382	29.4		6.37	0.32	0.29	0.005	0.002	0.012	0.017	0.031	6.2
HNS	Sanya	SY1	2012	0.11	B	0.65	29.65	1.54	0.0760667	0.608749	45.6908	1458.09	33.61	28		6.86	0.56	0.27	0.001	0.001	0.015	0.031	0.047	47
HNS	Sanya	SY1	2013	0.11	B	0.67	29.6433	1.69	0.0938	1.0872	42.1483	1673.21	32.378	28.2		6.63	0.42	0.23	0.003	0.003	0.027	0.026	0.056	18.6667
HNS	Sanya	SY1	2014	0.11	B	0	30.1617	6.32	0.0844667	0.754429	47.4843	1112.68	34.08	27.4	2.2	7.02	0.25	0.11			0.011	0.028	0.039
HNS	Sanya	SY1	2015	0.11	C	0	30.4017	5.12	0.0773	0.657423	46.2597	1209.84	33.131	30.6	5.9	6.4	0.34	0.03			0.002	0.021	0.023
HNS	Sanya	SY1	2016	0.11	C	0	29.9483	8.94	0.1005	1.021	47.3223	1494.44	33.181	26.9	19.8	7.22	0.41	0.09			0.018	0.031	0.049
HNS	Sanya	SY1	2017	0.11	C	0	30.06	6.04	0.1078	1.13844	43.605	1644.54	33.306	29.9	7.6	6.78	0.32	0.06	0.001	0	0.011	0.008	0.019	19
HNS	Sanya	SY1	2018	0.11	C	0	29.6917	1.77	0.06825	0.505973	45.5677	1307.79	33.582	27.2		6.56	0.63	0.14			0.015	0.03	0.045
HNS	Sanya	SY1	2019	0.11	C	0.05	29.79	4.76	0.0944333	0.926823	44.843	1373.09	35.1863		18.1	7.425	0.47	0.52	0.003	0.03695	0.0011	0.003	0.04105	13.6833
HNS	Sanya	SY1	2020	0.11	C	0.05	30.3217	12.76	0.07905	0.58536	46.325
HNS	Sanya	SY2	2002	0.1	A	0.25	29.4683	3	0.10124	1.21182	42.2125	1347.22
HNS	Sanya	SY2	2004	0.1	A	0	29.51	0.94	0.0831	0.770871	46.4507	916.483	31.8565	28.7	17.75	6.75			0.01035	0.00435	0.0074	0.03735	0.0491	4.74396
HNS	Sanya	SY2	2005	0.1	A	0	29.3283	0.66	0.100727	0.978137	41.6288	1434.23	34.43	28.66	1.92	6.26		0.28	0.034	0.002	0.039	0.018	0.059	1.73529
HNS	Sanya	SY2	2006	0.1	A	0	29.3667	2.37	0.0857556	0.714928	46.7653	1013.57	34.5333	27.7167	2.76667	6.52333		0.31	0.0045		0.0466667	0.0095	0.0561667	12.4815
HNS	Sanya	SY2	2007	0.1	A	0.25	29.635	3.99	0.0976833	0.94585	46.3173	1074.75	33.6333	27.59	2.7	6.03		0.126667	0.00733333	0.003	0.0196667	0.0386667	0.0613333	8.36364
HNS	Sanya	SY2	2008	0.1	A	0	29.325	1.51	0.0997167	1.08729	41.7	1417.55	33.8867		7.433	6.077		0.2	0.006		0.0216667	0.0253333	0.047	7.83333
HNS	Sanya	SY2	2009	0.1	A	0.05	29.6733	3.41	0.0927167	0.818923	44.65	1454.77	33.06	28.75	7.23333	6.3	0.426667	0.163333
HNS	Sanya	SY2	2010	0.1	B	0.65	29.8667	3.56	0.0935	0.905282	43.8733	1700.22	33.6267	28.4667	2.16667	6.37	0.243333	0.113333
HNS	Sanya	SY2	2011	0.1	B	0	29.4633	1.95	0.09025	0.932067	44.611	1425.91	33.4283	29.4767		6.27	0.273333	0.186667	0.001	0.003	0.0156667	0.0176667	0.0363333	36.3333
HNS	Sanya	SY2	2012	0.1	B	0.65	29.645	1.96	0.0769	0.615548	46.3408	1458.09	33.7233	27.2333		6.78	0.586667	0.21	0.00366667	0.00166667	0.03	0.0313333	0.063	17.1818
HNS	Sanya	SY2	2013	0.1	B	0.67	29.66	2.74	0.0920364	1.05528	42.2813	1673.21	30.7593	27.8		6.52667	0.62	0.1	0.00866667	0.00433333	0.047	0.0496667	0.101	11.6538
HNS	Sanya	SY2	2014	0.1	B	0	30.1817	6.64	0.0851167	0.758013	47.2573	1112.68	33.9533	28.2	3.4	7.08333	0.266667	0.31	0.00233333	0.003	0.014	0.021	0.038	16.2857
HNS	Sanya	SY2	2015	0.1	C	0	30.3867	6.29	0.0750833	0.610874	46.0033	1209.84	33.234	30.3667	11.9333	5.48667	0.27	0.196667	0.002	0.001	0.0115	0.0313333	0.0438333	21.9167
HNS	Sanya	SY2	2016	0.1	C	0	29.8933	8.98	0.0993667	0.99421	46.7847	1494.44	32.0007	25.8333	4.83333	7.98667	1.11	1.67667	0.00166667	0.01	0.0586667	0.0316667	0.100333	60.2
HNS	Sanya	SY2	2017	0.1	C	0	30.085	6.74	0.101483	1.01595	44.171	1644.54	32.9537	30.4333	7.06667	5.90667	0.38	0.08	0.003	0.004	0.036	0.0283333	0.0683333	22.7778
HNS	Sanya	SY2	2018	0.1	C	0	29.66	1.35	0.07885	0.649477	45.5207	1307.79	33.068	27.7333		6.52333	0.493333	0.123333	0.003	0.00166667	0.0316667	0.0376667	0.071	23.6667
HNS	Sanya	SY2	2019	0.1	C	0.05	29.8067	5.41	0.09605	0.944864	45.3993	1373.09	35.1726		18	7.07	0.375	1.08	0.001	0.0344	0.0016	0.003	0.039	39
HNS	Sanya	SY2	2020	0.1	C	0.05	30.3	13.13	0.0815833	0.619703	45.733
HNS	Sanya	SY3	2004	3.01	A	0	29.1983	0.16	0.0663833	0.543221	46.5307	916.483	34.199	25.7	13.45	6.945		0.5805	0.00365	0.00315	0.0081	0.0041	0.01535	4.20548
HNS	Sanya	SY3	2005	3.01	A	0	28.9317	0	0.100545	1.01121	42.1084	1434.23	34.46	27.62	0.43	6.57		0.108	0.0215	0.0005	0.006	0.052	0.0585	2.72093
HNS	Sanya	SY3	2006	3.01	A	0	29.325	2.08	0.076	0.583001	46.413	1013.57	34.4167	28.8533	2.06667	6.43333			0.0025	0.002	0.0256667	0.0696667	0.0973333	38.9333
HNS	Sanya	SY3	2007	3.01	A	0.25	29.275	1.44	0.0720667	0.585043	47.0553	1074.75	33.3767	28.76	3.2	6.23667		0.0966667		0.001	0.0153333	0.0256667	0.042
HNS	Sanya	SY3	2008	3.01	A	0	29.025	1.67	0.0902667	0.871576	42.3657	1417.55	33.23		8.2	6.947		0.04	0.003		0.015	0.027	0.042	14
HNS	Sanya	SY3	2009	3.01	A	0.05	29.5067	2.3	0.0787	0.503783	42.911	1454.77	32.8433	27.03	2.16667	6.90333	0.24	0.0533333
HNS	Sanya	SY3	2010	3.01	B	0.65	29.535	0.81	0.07375	0.588698	44.2433	1700.22	33.5633	27.4333	6.5	6.7	0.226667	0.12
HNS	Sanya	SY3	2011	3.01	B	0	29.1017	0.32	0.06975	0.529988	44.7847	1425.91	32.7713	28.4967		6.50333	0.406667	0.0733333	0.00166667	0.00266667	0.0105	0.0173333	0.0305	18.3
HNS	Sanya	SY3	2012	3.01	B	0.65	29.4133	0.67	0.0701667	0.519096	45.0108	1458.09	31.24	28.1667		6.89	0.53	0.343333	0.001	0.00166667	0.0213333	0.0303333	0.0533333	53.3333
HNS	Sanya	SY3	2013	3.01	B	0.67	29.285	0.3	0.0790545	0.660672	41.2797	1673.21	31.312	27.3333		6.41333	0.626667	0.0533333	0.003	0.00166667	0.055	0.0273333	0.084	28
HNS	Sanya	SY3	2014	3.01	B	0	29.8283	3	0.06525	0.449321	47.8673	1112.68	34.21	26.9667	3.1	6.82667	0.206667	0.08	0.00133333		0.038	0.0356667	0.0736667	55.25
HNS	Sanya	SY3	2015	3.01	C	0	30.0017	3.82	0.0971833	0.987186	46.861	1209.84	33.5103	30.2	8.36667	6.48667	0.273333	0.0266667	0.002		0.0233333	0.0473333	0.0706667	35.3333
HNS	Sanya	SY3	2016	3.01	C	0	29.845	4.31	0.0811	0.68487	47.6107	1494.44	32.3377	27.3667	4.2	7.3	0.576667	0.163333		0.00233333	0.0493333	0.035	0.0866667
HNS	Sanya	SY3	2017	3.01	C	0	29.7917	4.03	0.111383	1.16684	44.6453	1644.54	29.7917	30	9.66667	7.22	0.446667	0.21	0.001	0.00133333	0.0656667	0.00966667	0.0766667	76.6667
HNS	Sanya	SY3	2018	3.01	C	0	29.2967	1.16	0.0701667	0.542645	45.3737	1307.79	32.7897	28.7		6.43333	1.64333	0.0933333	0.001	0.001	0.025	0.0443333	0.0703333	70.3333
HNS	Sanya	SY3	2019	3.01	C	0.05	29.5133	0.35	0.0806833	0.688211	45.117	1373.09	34.0395		14.7	7.09	0.555	0.85	0.001	0.0499	0.0013	0.0035	0.0547	54.7
HNS	Sanya	SY3	2020	3.01	C	0.05	30.0667	10.24	0.0794167	0.68766	45.5463
HNS	Sanya	SY4	2002	6.7	A	0.25	29.4717	3.17	0.08604	0.607393	42.4005	1347.22
HNS	Sanya	SY4	2004	6.7	A	0	29.4933	1.22	0.09425	0.959019	47.499	916.483
HNS	Sanya	SY4	2005	6.7	A	0	29.3417	0.95	0.113836	1.19282	43.1148	1434.23	34.56	28.17	1	6.07		0.025	0.013	0.0017	0.0505	0.021	0.0732	5.63077
HNS	Sanya	SY4	2006	6.7	A	0	29.3783	2.51	0.103267	0.900272	47.163	1013.57	34.59	27.37	1.8	6.17333			0.00633333		0.0706667	0.00966667	0.0803333	12.6842
HNS	Sanya	SY4	2007	6.7	A	0.25	29.6317	3.74	0.11115	1.18599	47.0303	1074.75	33.9267	27.6867	1.46667	6.63667		0.0733333	0.00433333	0.003	0.01	0.0196667	0.0326667	7.53846
HNS	Sanya	SY4	2008	6.7	A	0	29.32	1.66	0.110717	1.14132	42.2023	1417.55	33.914		2.96	5.988		0.0666667	0.0045	0.0055	0.0214	0.018	0.0449	9.97778
HNS	Sanya	SY4	2009	6.7	A	0.05	29.6867	3.83	0.106367	0.985022	44.902	1454.77	33.16	27.77	4.13333	6.56667	0.316667	0.103333
HNS	Sanya	SY4	2010	6.7	B	0.65	29.8517	3.54	0.0896333	0.866967	44.4597	1700.22	33.7233	27.3	4.5	6.78333	0.15	0.14
HNS	Sanya	SY4	2011	6.7	B	0	29.465	2	0.105133	1.17135	44.8387	1425.91	33.4507	29.4367		6.57333	0.263333	0.0566667	0.001	0.002	0.00233333	0.00966667	0.014	14
HNS	Sanya	SY4	2012	6.7	B	0.65	29.66	2.33	0.0887	0.807391	46.0452	1458.09	33.57	27.9667		6.53333	0.273333	0.05	0.00266667	0.001	0.0246667	0.0303333	0.056	21
HNS	Sanya	SY4	2013	6.7	B	0.67	29.67	2.96	0.0835273	0.906151	42.6533	1673.21	32.476	27.6		6.33333	0.19	0.04	0.00266667	0.00266667	0.0193333	0.028	0.05	18.75
HNS	Sanya	SY4	2014	6.7	B	0	30.19	6.46	0.0885167	0.82464	47.7463	1112.68	33.8	26.6	3.66667	6.75667	0.126667	0.0733333	0.00233333	0.001	0.031	0.0266667	0.0586667	25.1429
HNS	Sanya	SY4	2015	6.7	C	0	30.3633	6.52	0.105317	1.09164	46.739	1209.84	33.1843	29.8	8.5	6.29333	0.223333	0.0366667	0.0015	0	0.0253333	0.021	0.0463333	30.8889
HNS	Sanya	SY4	2016	6.7	C	0	29.86	8.46	0.104117	1.10382	47.4653	1494.44	33.5773	25.6333	4.23333	7.70667	0.606667	0.28	0.002	0	0.015	0.0276667	0.0426667	21.3333
HNS	Sanya	SY4	2017	6.7	C	0	30.0833	7.12	0.0957833	0.955525	44.8187	1644.54	33.4723	30.4	6.96667	6.74333	0.236667	0.0566667	0.00166667		0.00766667	0.0106667	0.0183333	11
HNS	Sanya	SY4	2018	6.7	C	0	29.6617	1.2	0.09265	0.880228	46.9987	1307.79	33.5493	28.2		6.45333	0.476667	0.0866667	0.003	0.002	0.0246667	0.0203333	0.047	15.6667
HNS	Sanya	SY4	2019	6.7	C	0.05	29.835	5.6	0.10655	1.10314	46.7067	1373.09	35.1904		15.1	7.315	0.42	0.58	0.001	0.03335	0.00095	0.0025	0.0368	36.8
HNS	Sanya	SY4	2020	6.7	C	0.05	30.3	12.83	0.0899833	0.710394	46.2793
HNS	Sanya	SY5	2002	0.29	A	0.25	29.4683	3	0.10124	1.21183	44.116	1347.22
HNS	Sanya	SY5	2004	0.29	A	0	29.51	0.94	0.0831167	0.770865	47.2317	916.483
HNS	Sanya	SY5	2005	0.29	A	0	29.3283	0.66	0.100727	0.978065	42.4884	1434.23	34.52	28.59	1.05	6.29		0.14	0.0145	0.0013	0.0315	0.0197	0.0525	3.62069
HNS	Sanya	SY5	2006	0.29	A	0	29.3667	2.37	0.0857556	0.714843	47.9603	1013.57	34.58	28.195	2.6	6.565		0.06	0.024	0.001	0.0325	0.0175	0.051	2.125
HNS	Sanya	SY5	2007	0.29	A	0.25	29.635	3.99	0.0976833	0.945788	47.286	1074.75	33.82	27.71	3.25	6.81		0.07	0.0045	0.0025	0.0195	0.025	0.047	10.4444
HNS	Sanya	SY5	2008	0.29	A	0	29.325	1.51	0.0997167	1.08716	43.3447	1417.55	33.795		1.9	5.88		0.045	0.001		0.0245	0.031	0.0555	55.5
HNS	Sanya	SY5	2009	0.29	A	0.05	29.6733	3.41	0.0927167	0.818908	45.7457	1454.77	33.15	28.065	12.4	6.715	0.345	0.095
HNS	Sanya	SY5	2010	0.29	B	0.65	29.8667	3.56	0.0934667	0.905261	44.817	1700.22	33.735	27	12.7	6.445	0.27	0.235
HNS	Sanya	SY5	2011	0.29	B	0	29.4633	1.95	0.09025	0.93198	45.9213	1425.91	33.3065	29.68		6.24	0.415	0.135	0.001	0.002	0.0165	0.0115	0.03	30
HNS	Sanya	SY5	2012	0.29	B	0.65	29.645	1.96	0.0769	0.615538	46.6592	1458.09	33.115	28.1		6.815	0.54	0.345	0.001	0.001	0.0145	0.024	0.0395	39.5
HNS	Sanya	SY5	2013	0.29	B	0.67	29.66	2.74	0.0922	1.05846	43.4677	1673.21	32.3755	28.2		6.77	0.555	0.48	0.001	0.001	0.022	0.035	0.058	58
HNS	Sanya	SY5	2014	0.29	B	0	30.1817	6.64	0.0851167	0.758007	48.354	1112.68	34.03	27.1	2.5	6.895	0.215	0.095	0.0015		0.0105	0.02	0.0305	20.3333
HNS	Sanya	SY5	2015	0.29	C	0	30.3867	6.29	0.0750667	0.61087	46.9423	1209.84	33.141	30.45	8	6.365	0.34	0.025	0.002	0.001	0.006	0.031	0.038	19
HNS	Sanya	SY5	2016	0.29	C	0	29.8933	8.98	0.0993667	0.994125	48.3247	1494.44	33.643	27.1	3.65	6.945	0.4	0.055	0.001	0.001	0.0255	0.038	0.0645	64.5
HNS	Sanya	SY5	2017	0.29	C	0	30.085	6.74	0.101483	1.01592	44.7087	1644.54	33.1085	30.1	9.75	6.905	0.575	0.09	0.0015		0.0045	0.01	0.0145	9.66667
HNS	Sanya	SY5	2018	0.29	C	0	29.66	1.35	0.07885	0.649372	47.373	1307.79	33.6205	26.85		6.595	0.475	0.345	0.001	0.001	0.014	0.032	0.047	47
HNS	Sanya	SY5	2019	0.29	C	0.05	29.8067	5.41	0.09605	0.944771	47.1607	1373.09	35.2181		17	7.655	0.345	0.63		0.02365	0.00085	0.005	0.0295
HNS	Sanya	SY5	2020	0.29	C	0.05	30.3	13.13	0.0816	0.619699	47.3073
HNS	Sanya	SY6	2004	0.63	A	0	29.41	0.48	0.0720667	0.608757	46.7903	916.483
HNS	Sanya	SY6	2005	0.63	A	0	29.075	0	0.0967091	0.933211	41.856	1434.23	34.64	27.55	1.3	6.28		0.07	0.0103	0	0.0055	0.039	0.0445	4.32039
HNS	Sanya	SY6	2006	0.63	A	0	29.37	1.76	0.0816	0.636568	46.842	1013.57	34.5867	28.8	1	6.42333		0.02	0.00533333		0.0223333	0.0146667	0.037	6.9375
HNS	Sanya	SY6	2007	0.63	A	0.25	29.4833	1.4	0.0704667	0.560011	46.2933	1074.75	33.9267	28.97	1.46667	6.63667		0.0733333	0.00433333	0.003	0.01	0.0196667	0.0326667	7.53846
HNS	Sanya	SY6	2008	0.63	A	0	29.215	1.01	0.0867667	0.862081	43.0523	1417.55	34.0983		2.08333	6.39833		0.05	0.005	0.002	0.0193333	0.018	0.0393333	7.86667
HNS	Sanya	SY6	2009	0.63	A	0.05	29.605	1.97	0.07355	0.619562	44.2737	1454.77	33.1933	27.9533	3.43333	6.81	0.236667	0.0666667
HNS	Sanya	SY6	2010	0.63	B	0.65	29.7333	1.46	0.07855	0.659356	44.6003	1700.22	33.7767	26.7	4.93333	6.69333	0.273333	0.08
HNS	Sanya	SY6	2011	0.63	B	0	29.2733	0.92	0.0661667	0.562236	45.6447	1425.91	33.4327	29.6		5.92	0.306667	0.0633333	0.002	0.002	0.019	0.016	0.037	18.5
HNS	Sanya	SY6	2012	0.63	B	0.65	29.5733	0.82	0.0701833	0.527223	45.4972	1458.09	33.1967	28.3667		7.27333	0.673333	0.23	0.00133333	0.001	0.013	0.025	0.039	29.25
HNS	Sanya	SY6	2013	0.63	B	0.67	29.445	0.64	0.0828909	0.871201	41.6677	1673.21	32.7963	27.7667		6.44667	0.336667	0.196667	0.00133333	0.001	0.0166667	0.0293333	0.047	35.25
HNS	Sanya	SY6	2014	0.63	B	0	30	3.77	0.0709667	0.518693	47.8483	1112.68	33.99	26.1667	4.2	8.21667	0.183333	0.123333	0.00133333		0.00933333	0.0213333	0.0306667	23
HNS	Sanya	SY6	2015	0.63	C	0	30.26	4.13	0.0834167	0.707457	47.687	1209.84	33.23	30.4667	8.03333	6.33	0.256667	0.02	0.001	0.001	0.017	0.038	0.056	56
HNS	Sanya	SY6	2016	0.63	C	0	29.945	5.99	0.07735	0.647795	47.937	1494.44	33.6673	25.2333	2.16667	7.69333	0.516667	0.133333	0.001	0	0.018	0.0223333	0.0403333	40.3333
HNS	Sanya	SY6	2017	0.63	C	0	29.9467	3.57	0.0868333	0.835967	43.8973	1644.54	33.4787	30.8667	4.5	6.76667	0.413333	0.0433333	0.001		0.004	0.0116667	0.0156667	15.6667
HNS	Sanya	SY6	2018	0.63	C	0	29.5567	1.16	0.0572167	0.384666	46.4873	1307.79	33.7443	28.35		6.45	0.416667	0.07	0.001		0.015	0.0236667	0.0386667	38.6667
HNS	Sanya	SY6	2019	0.63	C	0.05	29.6333	1.32	0.0696667	0.524231	46.197	1373.09	35.246		13.4	7	0.405	0.24		0.0436	0.00075	0.0065	0.05085
HNS	Sanya	SY6	2020	0.63	C	0.05	30.2833	10.57	0.0662167	0.483976	45.8167
HNXS	Sansha	SH1	2005	324	A	0.02	29.7817	1.45	0.0495636	0.293343	44.5752	1092.59	34.887	29.9	0.65	6.1867			0.00167	0.00083	0.0663	0.027	0.09413	56.3653
HNXS	Sansha	SH1	2006	324	A	0.39	29.3933	1.03	0.0432889	0.219824	48.637	1133.13	34.1333	27.61	1.3	6.16333		0.26	0.0123333	0.002	0.0156667	0.0256667	0.0433333	3.51351
HNXS	Sansha	SH1	2007	324	A	0.15	29.9617	1.46	0.0414667	0.209502	47.6733	1027.83	33.87	29.5433	9.6	6.33		0.0466667	0.006	0.001	0.038	0.008	0.047	7.83333
HNXS	Sansha	SH1	2008	324	A	0.4	29.64	0.95	0.0471	0.271724	47.3913	1197.79	33.0767	29.2467	1.9	6.12		0.03
HNXS	Sansha	SH1	2009	324	A	0.38	29.7117	2.55	0.04395	0.226599	44.682	1127.28	33.0767	29.2467	1.9	6.12		0.03
HNXS	Sansha	SH1	2010	324	B	0	30.0517	1.61	0.0376167	0.165591	45.3747	1249.6	34.15	28.9833	3.56667	6.18		0.04
HNXS	Sansha	SH1	2011	324	B	0	29.6817	0.96	0.0406167	0.173894	46.8737	1006.52	33.6457	31.0167		6.75	0.41	0.06	0.00266667		0.012	0.0176667	0.0296667	11.125
HNXS	Sansha	SH1	2012	324	B	0.38	30.0417	1.13	0.0411167	0.192441	45.2568	1252.82	33.86	29.9333		7.58333	0.186667	0.03	0.002	0.001	0.0173333	0.038	0.0563333	28.1667
HNXS	Sansha	SH1	2013	324	B	0.62	29.735	1.97	0.0453636	0.244523	43.411	1225.56	33.8533	29.4		6.31333	0.243333	0.0533333	0.00166667	0.001	0.00533333	0.0146667	0.021	12.6
HNXS	Sansha	SH1	2014	324	B	0	30.4733	11.61	0.0357	0.1494	46.187	1150.01	33.2978		12.5333	7.27667	0.34	0.12	0.0041	0.000633333	0.0193333	0.0503333	0.0703	17.1463
HNXS	Sansha	SH1	2015	324	C	0.02	30.5167	6.5	0.0392833	0.209029	48.5177	1126.97	33.71		11.2667	6.75	0.426667	0.05	0.001	0.0002	0.00613333	0.0223333	0.0286667	28.6667
HNXS	Sansha	SH1	2016	324	C	0	30.3033	5.15	0.0430833	0.218332	46.478	1346.62	33.5257		20.1667	6.41333	0.177776	0.043	0.000863333	0.00118333	0.0122	0.0364333	0.0498167	57.7027
HNXS	Sansha	SH1	2017	324	C	0.15	29.9933	0.3	0.0501167	0.340224	45.5313	1162.66	33.694		6.6	5.93333	0.553205	0.0466667	0.00326333	0.00183333	0.0212	0.0552667	0.0783	23.9939
HNXS	Sansha	SH1	2018	324	C	0	30.145	2.6	0.0396833	0.184648	47.9627	1068.26	33.924		14.6	5.65667	0.164667	0.12	0.00785667	0.000348667	0.0445667	0.0117333	0.0566487	7.21027
HNXS	Sansha	SH1	2019	324	C	0	29.9117	6.25	0.0423	0.207644	47.4223	1124.63	33.8115		5.22	7.615	0.345	0.09325	0.00325	0.000775	0.01775	0.01425	0.032775	10.0846
HNXS	Sansha	SH1	2020	324	C	0.15	30.5483	13.82	0.0523833	0.409857	47.1107
HNXS	Sansha	SH2	2005	312	A	0.02	29.7417	1.4	0.0424	0.205477	45.136	1092.59	34.94	29.567	0.9833	6.22					0.0425	0.0188	0.0613
HNXS	Sansha	SH2	2006	312	A	0.39	29.425	1.04	0.0397778	0.190312	48.555	1133.13	34.0733	27.55	1.3	6.29		0.02	0.035	0.00133333	0.01	0.0153333	0.0266667	0.761905
HNXS	Sansha	SH2	2007	312	A	0.15	29.9567	1.85	0.0396833	0.200941	47.1377	1027.83	33.82	29.4367	2.45	6.52333		0.02	0.024		0.0466667		0.0466667	1.94444
HNXS	Sansha	SH2	2008	312	A	0.4	29.655	0.96	0.0525667	0.387288	47.108	1197.79	34.02	28.8167	1.03333	6.13333		0.0233333
HNXS	Sansha	SH2	2009	312	A	0.38	29.725	2.44	0.0429	0.194566	44.9143	1127.28	34.02	28.8167	1.03333	6.13333		0.0233333
HNXS	Sansha	SH2	2010	312	B	0	30.0717	2.05	0.0403	0.211102	45.1457	1249.6	33.99	28.5833	2.56667	6.48333		0.0433333
HNXS	Sansha	SH2	2011	312	B	0	29.6617	1.26	0.0402833	0.173701	47.278	1006.52	33.668	31.2		6.92333	0.363333	0.0766667	0.00233333	0.001	0.0373333	0.0233333	0.0616667	26.4286
HNXS	Sansha	SH2	2012	312	B	0.38	30.0317	0.78	0.0369333	0.14591	45.9216	1252.82	33.8367	29.7333		6.48667	0.256667	0.0566667	0.0015	0.001	0.0123333	0.0443333	0.0576667	38.4444
HNXS	Sansha	SH2	2013	312	B	0.62	29.7267	2.01	0.0374364	0.169618	43.02	1225.56	33.7233	29.4		6.45333	0.236667	0.0433333	0.00166667	0.001	0.001	0.016	0.018	10.8
HNXS	Sansha	SH2	2014	312	B	0	30.4333	11.56	0.0368	0.149328	46.09	1150.01	33.1897		13.1333	6.09667	0.193333	0.16	0.00246667	0.00143333	0.0216667	0.063	0.0861	34.9054
HNXS	Sansha	SH2	2015	312	C	0.02	30.54	7.55	0.0385333	0.206724	48.7657	1126.97	33.5997		11.7	6.81667	0.336667	0.06	0.00113333	0.000366667	0.00556667	0.029	0.0349333	30.8235
HNXS	Sansha	SH2	2016	312	C	0	30.3	5.91	0.0364167	0.152337	46.4867	1346.62	33.5637		16.4667	6.14333	0.290512	0.054	0.00106333	0.00213667	0.00873333	0.0462	0.05707	53.6708
HNXS	Sansha	SH2	2017	312	C	0.15	29.9967	0.61	0.038	0.143741	46.0917	1162.66	33.6673		8.66667	6.24667	0.453781	0.0533333	0.00192	0.00176667	0.0134667	0.0404667	0.0557	29.0104
HNXS	Sansha	SH2	2018	312	C	0	30.1767	3.22	0.0360667	0.148048	48.5067	1068.26	33.9473		11.6333	5.71333	0.265	0.13	0.00787333	0.000784667	0.0486	0.0103	0.0596847	7.58061
HNXS	Sansha	SH2	2019	312	C	0	29.9283	6.42	0.0402333	0.19241	47.213	1124.63	33.7361		10.575	8.4325	0.3	0.153333	0.00275	0.0012	0.017	0.022	0.0402	14.6182
HNXS	Sansha	SH2	2020	312	C	0.15	30.5667	14.62	0.0399833	0.159844	47.7383
HNXS	Sansha	SH3	2005	333.36	A	0.02	29.7283	1.06	0.0386545	0.172189	45.812	1092.59	34.91	29.8	0.8	6.2267				0.0005	0.037	0.012	0.0495
HNXS	Sansha	SH3	2006	333.36	A	0.39	29.31	0.7	0.0417778	0.190145	48.4627	1133.13	34.19	27.27	0.8	6.19			0.005	0.002	0.0126667	0.00266667	0.0173333	3.46667
HNXS	Sansha	SH3	2007	333.36	A	0.15	29.9333	1.35	0.03645	0.16238	48.0287	1027.83	33.82	29.29	2.45	6.52333		0.02	0.024		0.0466667		0.0466667	1.94444
HNXS	Sansha	SH3	2008	333.36	A	0.4	29.6183	0.45	0.0373333	0.167586	47.49	1197.79	33.05	29.28	4.33333	6.65		0.0266667
HNXS	Sansha	SH3	2009	333.36	A	0.38	29.6983	2.32	0.04095	0.170864	44.6767	1127.28	33.05	29.28	4.33333	6.65		0.0266667
HNXS	Sansha	SH3	2010	333.36	B	0	29.9983	1.27	0.03495	0.14535	46.223	1249.6
HNXS	Sansha	SH3	2011	333.36	B	0	29.6333	1.05	0.0418833	0.190791	47.264	1006.52	33.6833	30.61		7.32667	0.563333	0.0633333	0.004		0.0123333	0.02	0.0323333	8.08333
HNXS	Sansha	SH3	2012	333.36	B	0.38	30.0183	0.92	0.0359667	0.153293	45.394	1252.82	33.83	29.6		6.90333	0.21	0.0333333	0.001	0.001	0.0236667	0.0366667	0.0613333	61.3333
HNXS	Sansha	SH3	2013	333.36	B	0.62	29.735	2.39	0.0416909	0.240271	44.002	1225.56	33.735	29.7		7.11	0.273333	0.04	0.002	0.001	0.0243333	0.0376667	0.063	31.5
HNXS	Sansha	SH3	2014	333.36	B	0	30.445	10.43	0.0373333	0.16321	46.1193	1150.01	33.3564		14.3333	6.86667	0.163333	0.126667	0.00423333	0.00113333	0.015	0.042	0.0581333	13.7323
HNXS	Sansha	SH3	2015	333.36	C	0.02	30.435	5.62	0.0347833	0.162467	49.026	1126.97	33.6213		11.2333	6.85333	0.376667	0.05	0.00166667	0.000833333	0.0068	0.0263333	0.0339667	20.38
HNXS	Sansha	SH3	2016	333.36	C	0	30.24	4.47	0.03235	0.149252	45.8653	1346.62	33.6083		17.8667	6.38	0.416256	0.0596667	0.00123	0.00187	0.0167	0.0399	0.05847	47.5366
HNXS	Sansha	SH3	2017	333.36	C	0.15	29.9283	0	0.03545	0.158922	45.9493	1162.66	33.7087		8.7	6.10333	0.604275	0.03	0.00353333	0.00271	0.0407667	0.0558333	0.09931	28.1066
HNXS	Sansha	SH3	2018	333.36	C	0	30.13	2.52	0.0334667	0.145946	47.4373	1068.26	33.9687		16	6.66333	0.173667	0.1	0.00764333	0.000648667	0.0271333	0.00731667	0.0350987	4.59206
HNXS	Sansha	SH3	2019	333.36	C	0	29.8417	5.94	0.0353333	0.169014	47.9517	1124.63	33.6452		22.42	6.54	0.34	0.222	0.004	0.0011	0.023	0.007	0.0311	7.775
HNXS	Sansha	SH3	2020	333.36	C	0.15	30.495	12.31	0.0366667	0.153744	47.3207
HNXS	Sansha	SH4	2005	319	A	0.02	29.7633	1.43	0.0542182	0.33715	44.0484	1092.59	34.885	29.8	1.2667	6.005				0.001	0.0268	0.0197	0.0475
HNXS	Sansha	SH4	2006	319	A	0.39	29.395	1.02	0.0432444	0.223245	48.3143	1133.13	34.1	27.5267	0.966667	6.18333		0.0233333	0.013	0.00166667	0.0156667	0.028	0.0453333	3.48718
HNXS	Sansha	SH4	2007	319	A	0.15	29.96	1.66	0.0396667	0.183998	46.6313	1027.83	33.82	29.53	2.45	6.52333		0.02	0.024		0.0466667		0.0466667	1.94444
HNXS	Sansha	SH4	2008	319	A	0.4	29.6467	0.96	0.0455	0.262253	46.8293	1197.79	33.09	29.2467	2	6.19667		0.02
HNXS	Sansha	SH4	2009	319	A	0.38	29.7183	2.5	0.0446167	0.207313	44.553	1127.28	33.09	29.2467	2	6.19667		0.02
HNXS	Sansha	SH4	2010	319	B	0	30.0617	1.91	0.0515833	0.396983	44.759	1249.6	33.9867	28.8067	2.7	6.39667		0.0266667
HNXS	Sansha	SH4	2011	319	B	0	29.6667	1.25	0.0398333	0.168752	45.8333	1006.52	33.688	31.2033		6.76667	0.323333	0.06	0.00266667		0.00833333	0.015	0.0233333	8.75
HNXS	Sansha	SH4	2012	319	B	0.38	30.0317	0.8	0.0441667	0.229826	45.362	1252.82	33.81	29.7		6.48	0.243333	0.05		0.001	0.0193333	0.038	0.0583333
HNXS	Sansha	SH4	2013	319	B	0.62	29.7333	2.14	0.0504	0.327148	42.5693	1225.56	33.79	29.5		6.68333	0.486667	0.0533333	0.001	0.001	0.018	0.051	0.07	70
HNXS	Sansha	SH4	2014	319	B	0	30.4583	11.69	0.0364167	0.160059	45.2413	1150.01	33.2922		13.3667	6.63	0.18	0.11	0.00186667	0.00103333	0.0176667	0.0576667	0.0763667	40.9107
HNXS	Sansha	SH4	2015	319	C	0.02	30.5317	7.27	0.0890333	1.02951	48.204	1126.97	33.654		10.3667	6.64667	0.383333	0.0266667	0.00113333	0.000166667	0.004	0.025	0.0291667	25.7353
HNXS	Sansha	SH4	2016	319	C	0	30.2983	5.63	0.0474333	0.273026	46.397	1346.62	33.5213		19.7667	6.01667	0.262328	0.0436667	0.00115333	0.00200667	0.0112	0.0335667	0.0467733	40.5549
HNXS	Sansha	SH4	2017	319	C	0.15	29.9917	0.45	0.0465333	0.307776	44.976	1162.66	33.715		8.1	6.22333	0.65008	0.04	0.00322	0.00247	0.0400333	0.0537	0.0962033	29.8768
HNXS	Sansha	SH4	2018	319	C	0	30.1533	2.9	0.0432333	0.238195	47.9527	1068.26	33.9353		13.2	5.75333	0.279333	0.226667	0.0066	0.0005	0.0443667	0.01	0.0548667	8.31313
HNXS	Sansha	SH4	2019	319	C	0	29.9183	6.27	0.0525667	0.347845	46.5927	1124.63	33.8925		5.05	7.21	0.235	0.174	0.00175	0.00075	0.017	0.012	0.02975	17
HNXS	Sansha	SH4	2020	319	C	0.15	30.5567	14.54	0.0673	0.579741	46.997

## Sheet: distance-area
Region	city	Site	Time	Offshore Distance	Coral reef area (km2)
HNE	Qionghai	QH1	2004	0.51	43.08
HNE	Qionghai	QH1	2005	0.51
HNE	Qionghai	QH1	2006	0.51
HNE	Qionghai	QH1	2007	0.51
HNE	Qionghai	QH1	2008	0.51
HNE	Qionghai	QH1	2009	0.51
HNE	Qionghai	QH1	2010	0.51
HNE	Qionghai	QH1	2011	0.51
HNE	Qionghai	QH1	2012	0.51
HNE	Qionghai	QH1	2013	0.51
HNE	Qionghai	QH1	2014	0.51
HNE	Qionghai	QH1	2015	0.51
HNE	Qionghai	QH1	2016	0.51
HNE	Qionghai	QH1	2017	0.51
HNE	Qionghai	QH1	2018	0.51
HNE	Qionghai	QH1	2019	0.51
HNE	Qionghai	QH1	2020	0.51
HNE	Wenchang	WC1	2004	0.42	62.44
HNE	Wenchang	WC1	2005	0.42
HNE	Wenchang	WC1	2006	0.42
HNE	Wenchang	WC1	2007	0.42
HNE	Wenchang	WC1	2008	0.42
HNE	Wenchang	WC1	2009	0.42
HNE	Wenchang	WC1	2010	0.42
HNE	Wenchang	WC1	2011	0.42
HNE	Wenchang	WC1	2012	0.42
HNE	Wenchang	WC1	2013	0.42
HNE	Wenchang	WC1	2014	0.42
HNE	Wenchang	WC1	2015	0.42
HNE	Wenchang	WC1	2016	0.42
HNE	Wenchang	WC1	2017	0.42
HNE	Wenchang	WC1	2018	0.42
HNE	Wenchang	WC1	2019	0.42
HNE	Wenchang	WC1	2020	0.42
HNE	Wenchang	WC2	2006	2.29
HNE	Wenchang	WC2	2007	2.29
HNE	Wenchang	WC2	2008	2.29
HNE	Wenchang	WC2	2009	2.29
HNE	Wenchang	WC2	2010	2.29
HNE	Wenchang	WC2	2011	2.29
HNE	Wenchang	WC2	2012	2.29
HNE	Wenchang	WC2	2013	2.29
HNE	Wenchang	WC2	2014	2.29
HNE	Wenchang	WC2	2015	2.29
HNE	Wenchang	WC2	2016	2.29
HNE	Wenchang	WC2	2017	2.29
HNE	Wenchang	WC2	2018	2.29
HNE	Wenchang	WC2	2019	2.29
HNE	Wenchang	WC2	2020	2.29
HNS	Sanya	SY1	2002	0.11	14.4
HNS	Sanya	SY1	2004	0.11
HNS	Sanya	SY1	2005	0.11
HNS	Sanya	SY1	2006	0.11
HNS	Sanya	SY1	2007	0.11
HNS	Sanya	SY1	2008	0.11
HNS	Sanya	SY1	2009	0.11
HNS	Sanya	SY1	2010	0.11
HNS	Sanya	SY1	2011	0.11
HNS	Sanya	SY1	2012	0.11
HNS	Sanya	SY1	2013	0.11
HNS	Sanya	SY1	2014	0.11
HNS	Sanya	SY1	2015	0.11
HNS	Sanya	SY1	2016	0.11
HNS	Sanya	SY1	2017	0.11
HNS	Sanya	SY1	2018	0.11
HNS	Sanya	SY1	2019	0.11
HNS	Sanya	SY1	2020	0.11
HNS	Sanya	SY2	2002	0.1
HNS	Sanya	SY2	2004	0.1
HNS	Sanya	SY2	2005	0.1
HNS	Sanya	SY2	2006	0.1
HNS	Sanya	SY2	2007	0.1
HNS	Sanya	SY2	2008	0.1
HNS	Sanya	SY2	2009	0.1
HNS	Sanya	SY2	2010	0.1
HNS	Sanya	SY2	2011	0.1
HNS	Sanya	SY2	2012	0.1
HNS	Sanya	SY2	2013	0.1
HNS	Sanya	SY2	2014	0.1
HNS	Sanya	SY2	2015	0.1
HNS	Sanya	SY2	2016	0.1
HNS	Sanya	SY2	2017	0.1
HNS	Sanya	SY2	2018	0.1
HNS	Sanya	SY2	2019	0.1
HNS	Sanya	SY2	2020	0.1
HNS	Sanya	SY3	2004	3.01
HNS	Sanya	SY3	2005	3.01
HNS	Sanya	SY3	2006	3.01
HNS	Sanya	SY3	2007	3.01
HNS	Sanya	SY3	2008	3.01
HNS	Sanya	SY3	2009	3.01
HNS	Sanya	SY3	2010	3.01
HNS	Sanya	SY3	2011	3.01
HNS	Sanya	SY3	2012	3.01
HNS	Sanya	SY3	2013	3.01
HNS	Sanya	SY3	2014	3.01
HNS	Sanya	SY3	2015	3.01
HNS	Sanya	SY3	2016	3.01
HNS	Sanya	SY3	2017	3.01
HNS	Sanya	SY3	2018	3.01
HNS	Sanya	SY3	2019	3.01
HNS	Sanya	SY3	2020	3.01
HNS	Sanya	SY4	2002	6.7
HNS	Sanya	SY4	2004	6.7
HNS	Sanya	SY4	2005	6.7
HNS	Sanya	SY4	2006	6.7
HNS	Sanya	SY4	2007	6.7
HNS	Sanya	SY4	2008	6.7
HNS	Sanya	SY4	2009	6.7
HNS	Sanya	SY4	2010	6.7
HNS	Sanya	SY4	2011	6.7
HNS	Sanya	SY4	2012	6.7
HNS	Sanya	SY4	2013	6.7
HNS	Sanya	SY4	2014	6.7
HNS	Sanya	SY4	2015	6.7
HNS	Sanya	SY4	2016	6.7
HNS	Sanya	SY4	2017	6.7
HNS	Sanya	SY4	2018	6.7
HNS	Sanya	SY4	2019	6.7
HNS	Sanya	SY4	2020	6.7
HNS	Sanya	SY5	2002	0.29
HNS	Sanya	SY5	2004	0.29
HNS	Sanya	SY5	2005	0.29
HNS	Sanya	SY5	2006	0.29
HNS	Sanya	SY5	2007	0.29
HNS	Sanya	SY5	2008	0.29
HNS	Sanya	SY5	2009	0.29
HNS	Sanya	SY5	2010	0.29
HNS	Sanya	SY5	2011	0.29
HNS	Sanya	SY5	2012	0.29
HNS	Sanya	SY5	2013	0.29
HNS	Sanya	SY5	2014	0.29
HNS	Sanya	SY5	2015	0.29
HNS	Sanya	SY5	2016	0.29
HNS	Sanya	SY5	2017	0.29
HNS	Sanya	SY5	2018	0.29
HNS	Sanya	SY5	2019	0.29
HNS	Sanya	SY5	2020	0.29
HNS	Sanya	SY6	2004	0.63
HNS	Sanya	SY6	2005	0.63
HNS	Sanya	SY6	2006	0.63
HNS	Sanya	SY6	2007	0.63
HNS	Sanya	SY6	2008	0.63
HNS	Sanya	SY6	2009	0.63
HNS	Sanya	SY6	2010	0.63
HNS	Sanya	SY6	2011	0.63
HNS	Sanya	SY6	2012	0.63
HNS	Sanya	SY6	2013	0.63
HNS	Sanya	SY6	2014	0.63
HNS	Sanya	SY6	2015	0.63
HNS	Sanya	SY6	2016	0.63
HNS	Sanya	SY6	2017	0.63
HNS	Sanya	SY6	2018	0.63
HNS	Sanya	SY6	2019	0.63
HNS	Sanya	SY6	2020	0.63
HNXS	Sansha	SH0	2002	333.36	1836.4	zhao(1999)	榆林湾为界
HNXS	Sansha	SH0	2003	333.36
HNXS	Sansha	SH0	2004	333.36
HNXS	Sansha	SH0	2005	333.36
HNXS	Sansha	SH0	2006	333.36
HNXS	Sansha	SH0	2007	333.36
HNXS	Sansha	SH0	2008	333.36
HNXS	Sansha	SH0	2009	333.36
HNXS	Sansha	SH0	2010	333.36
HNXS	Sansha	SH0	2011	333.36
HNXS	Sansha	SH0	2012	333.36
HNXS	Sansha	SH0	2013	333.36
HNXS	Sansha	SH0	2014	333.36
HNXS	Sansha	SH0	2015	333.36
HNXS	Sansha	SH0	2016	333.36
HNXS	Sansha	SH0	2017	333.36
HNXS	Sansha	SH0	2018	333.36
HNXS	Sansha	SH0	2019	333.36
HNXS	Sansha	SH0	2020	333.36
HNXS	Sansha	SH1	2005	324
HNXS	Sansha	SH1	2006	324
HNXS	Sansha	SH1	2007	324
HNXS	Sansha	SH1	2008	324
HNXS	Sansha	SH1	2009	324
HNXS	Sansha	SH1	2010	324
HNXS	Sansha	SH1	2011	324
HNXS	Sansha	SH1	2012	324
HNXS	Sansha	SH1	2013	324
HNXS	Sansha	SH1	2014	324
HNXS	Sansha	SH1	2015	324
HNXS	Sansha	SH1	2016	324
HNXS	Sansha	SH1	2017	324
HNXS	Sansha	SH1	2018	324
HNXS	Sansha	SH1	2019	324
HNXS	Sansha	SH1	2020	324
HNXS	Sansha	SH2	2005	312
HNXS	Sansha	SH2	2006	312
HNXS	Sansha	SH2	2007	312
HNXS	Sansha	SH2	2008	312
HNXS	Sansha	SH2	2009	312
HNXS	Sansha	SH2	2010	312
HNXS	Sansha	SH2	2011	312
HNXS	Sansha	SH2	2012	312
HNXS	Sansha	SH2	2013	312
HNXS	Sansha	SH2	2014	312
HNXS	Sansha	SH2	2015	312
HNXS	Sansha	SH2	2016	312
HNXS	Sansha	SH2	2017	312
HNXS	Sansha	SH2	2018	312
HNXS	Sansha	SH2	2019	312
HNXS	Sansha	SH2	2020	312
HNXS	Sansha	SH3	2005	333.36
HNXS	Sansha	SH3	2006	333.36
HNXS	Sansha	SH3	2007	333.36
HNXS	Sansha	SH3	2008	333.36
HNXS	Sansha	SH3	2009	333.36
HNXS	Sansha	SH3	2010	333.36
HNXS	Sansha	SH3	2011	333.36
HNXS	Sansha	SH3	2012	333.36
HNXS	Sansha	SH3	2013	333.36
HNXS	Sansha	SH3	2014	333.36
HNXS	Sansha	SH3	2015	333.36
HNXS	Sansha	SH3	2016	333.36
HNXS	Sansha	SH3	2017	333.36
HNXS	Sansha	SH3	2018	333.36
HNXS	Sansha	SH3	2019	333.36
HNXS	Sansha	SH3	2020	333.36
HNXS	Sansha	SH4	2005	319
HNXS	Sansha	SH4	2006	319
HNXS	Sansha	SH4	2007	319
HNXS	Sansha	SH4	2008	319
HNXS	Sansha	SH4	2009	319
HNXS	Sansha	SH4	2010	319
HNXS	Sansha	SH4	2011	319
HNXS	Sansha	SH4	2012	319
HNXS	Sansha	SH4	2013	319
HNXS	Sansha	SH4	2014	319
HNXS	Sansha	SH4	2015	319
HNXS	Sansha	SH4	2016	319
HNXS	Sansha	SH4	2017	319
HNXS	Sansha	SH4	2018	319
HNXS	Sansha	SH4	2019	319
HNXS	Sansha	SH4	2020	319

## Sheet: coral communities
Region	Time	Live coral coverage	Dead coral coverage	Juvenile coral density	Macroalgae	Coral reef fish	Coral Species	CoTS
HNE	2004	7.93	37.25	0.25		10	17
HNE	2005
HNE	2006	15.69	0.88	0.517		25	28
HNE	2007	26.96	2.58	0.18	0		38	50
HNE	2008	26.85	1.46	0.15	0	19	17
HNE	2009	12.93	0	1.58	4	19	29
HNE	2010	11	16	0	30	19	20
HNE	2011	13	3	0.38	40	16	20
HNE	2012	11	1	0.05	38	21	20
HNE	2013	6.5	0	0.1	48	25	20
HNE	2014	4.5	0	0.15	1	22	18
HNE	2015	4	0	0.1	37.4286	29.5	15
HNE	2016	4.5	0	0.7	42.4286	40	15
HNE	2017	4	0	0.4	34	40	14
HNE	2018	3	0	0.3	22.5	13.5	13
HNE	2019	3.5	0	0	32.5	13.5	17
HNE	2020	4.5	0	1	57	10.5	8
HNE	2004	8.7	17.17	0		15	14
HNE	2005
HNE	2006	26	3.21	1.48		27	37
HNE	2007	25.95	1.7	0.64	0		39
HNE	2008	23.25	0.86	0.42	0	18	18
HNE	2009	12	0	0.92	2	18	39
HNE	2010	14.75	0	0.35	1	18	24
HNE	2011	20.3	0.5	0.43	0	10	24
HNE	2012	21.5	0.1	0.6	2	22	24
HNE	2013	21.5	0.4	0.15	1	9.5	24
HNE	2014	21	0	0.65	2	20	23
HNE	2015	31	0	0.45	1.33333	69	25
HNE	2016	27.5	0	1.1	6.33333	34.5	26
HNE	2017	17.5	0	0.75	0	34.5	24
HNE	2018	14	0	0.5	0	47.5	24
HNE	2019	20.05	0	1.1	3.33333	51	60
HNE	2020	25	0	2.5	0	52.5	58
HNE	2004	0.33	64.67	0		5
HNE	2005	7.5	3	0.01
HNE	2006	51.58	2.13	2.7	0	66	27
HNE	2007	41	3.6	0.86	0		26
HNE	2008	38.75	0	0.7	0	21	22
HNE	2009	29.6	0	1.49	8	39	34
HNE	2010	13.83	1.5	0.15	39	21	16
HNE	2011	16.3	4.25	0.3	45	15	16
HNE	2012	9	0.25	0.05	45	41.5	16
HNE	2013	14.5	0.6	0.4	54	19	16
HNE	2014	7	0	0.15	1	12	16
HNE	2015	4	0	0.15	25.5	31	14
HNE	2016	6	0	0.5	79	28	14
HNE	2017	4	0	0.3	1.5	28	13
HNE	2018	3	0	0.2	15.5	10.5	11
HNE	2019	6.5	0	0.5	22.6667	9.5	22
HNE	2020	7.5	0	1	52.5	11	8
HNS	2002	50.5
HNS	2004	26.4				52
HNS	2005	18.4	0.4	0.113			21
HNS	2006	27.43	2.75	2.43		58	22
HNS	2007	40.85	2.63	0.43	0	42	35	300
HNS	2008	21.63	0	0.1	0	40	15
HNS	2009	28.3	0	0.75	0	65	34	200
HNS	2010	11.1	0	0.08	5	34	24
HNS	2011	24.9	3.75	0.08	4	21	24
HNS	2012	6	0	0.05	4	18	19
HNS	2013	6	0.2	0.025	3	45	20
HNS	2014	3	0	0.05	0	9	11
HNS	2015	1.5	0	0.1	1.85714	31.5	11
HNS	2016	3.5	0	0.4	2.6	37	11
HNS	2017	3.5	0	0.35	3.5	37	13
HNS	2018	3	0	0.25	4	12	11
HNS	2019	4.5	0	0.65	20.5	45	18
HNS	2020	4	0	1	4.5	25	18
HNS	2002	30
HNS	2004	23.18	27.84	1.08		48	33
HNS	2005	12.84	16.55	0.29		35	14
HNS	2006	15.7	6.35	0.88			24
HNS	2007	23.38	0.17	0.8	0	48	70
HNS	2008	20.9	0	0.65	0	51	20
HNS	2009	25.2	0	1	4	128	35
HNS	2010	18.25	0	0.38	3	90	16
HNS	2011	18.8	1.25	0.3	7	40	16
HNS	2012	19	0.25	0.2	3	17.5	16
HNS	2013	25.5	2	1.65	7	18	16
HNS	2014	24.5	0	0.5	2	26	32
HNS	2015	24.5	0	0.55	0	183	32
HNS	2016	25	0	1.6	2.33333	76	34
HNS	2017	25	0	0.85	0	32.5	34
HNS	2018	21	0	0.4	0	21	34
HNS	2019	24	2.5	0.9	0	112	59
HNS	2020	23.5	0	1.5	0	38	54
HNS	2004	35.92	1.58	0.05		38	19
HNS	2005	41.9	3.45	0.15			27
HNS	2006	48.24	4.86	0.393		191	46
HNS	2007	80	5.17	0.6	0	160	49
HNS	2008	72.45	0	0.45	0	183	28
HNS	2009	54.1	0	1.87	0	168	47	700
HNS	2010	36.5	0	0.4	0	153	42
HNS	2011	43	0.8	0.45	0	78	42
HNS	2012	38.5	0.85	0.3	0	181	42
HNS	2013	31	0.5	0.5	0	105.5	42
HNS	2014	34.3	0	0.55	0	196	42
HNS	2015	31.5	0	0.45	0	154	41
HNS	2016	26.5	0	1.4	0	138	41
HNS	2017	24.5	0	1.9	0.666667	110	40
HNS	2018	21.5	0	1.9	0	97.5	40
HNS	2019	21.5	0	1.5	0	99	63
HNS	2020	30	0	2.5	0	102	62
HNS	2002	66.54
HNS	2004
HNS	2005	20.85	0	0.057			18
HNS	2006	47.31	4.81	0.62		92	36
HNS	2007	55.17	1.17	0.47	0	40	65
HNS	2008	35.35	0	0.45	0	35	15
HNS	2009	35.9	0	0.4	0	62	35
HNS	2010	23.13	1.13	0.2	0	35	19
HNS	2011	24.3	1.13	0.15	6	33	19	200
HNS	2012	21	1.5	0.75	5	27.5	19
HNS	2013	24	0.25	0	5	22.5	19
HNS	2014	32	0	0.45	1	40	19
HNS	2015	22.5	0	0.45	0.5	79	22
HNS	2016	19.5	0	1	3.5	84	32
HNS	2017	15	0	0.6	4.2	22	31
HNS	2018	14.5	0	0.6	4	25.5	31
HNS	2019	13	0	1.3	4.5	58.5	54
HNS	2020	14	0	1.5	2.5	43	48
HNS	2002	30
HNS	2004
HNS	2005	43.03	0.4	0.113			22
HNS	2006	47.5	2.75	2.43			21
HNS	2007	40.54	9.46	0.62	0	45	48	300
HNS	2008	43.38	0	0.85	0	67	25	300
HNS	2009	42	0	0.58	1	60	48
HNS	2010	30.75	0	0.28	9	59	34
HNS	2011	14.9	4.75	0.25	13	28	34
HNS	2012	5.25	2.5	0.025	11	39	33
HNS	2013	7.5	0.25	0.4	8	25.5	33
HNS	2014	1.5	0	0	2	40.5	16
HNS	2015	3	0	0.15	4.85	40.5	16
HNS	2016	4	0	0.2	1.5	36.5	17
HNS	2017	7.5	0	0.6	1.6	36.5	17
HNS	2018	4	0	0.3	3.5	14.5	12
HNS	2019	8	0	0.65	4.66667	53	36
HNS	2020	13	0	1.5	5.33333	31.5	34
HNS	2004	56.8
HNS	2005	35.67	3.4	0.1			26
HNS	2006	77.21	12.67	0.42		364	42
HNS	2007	66.05	20.04	0.48	0	120	45	1200
HNS	2008	35.38	3.61	0.4	0	93	9
HNS	2009	35.1	39.45	0.65	0	53	45	400
HNS	2010	29.9	3.87	0.35	0	45	31
HNS	2011	28.1	0.75	0.4	0	53	31
HNS	2012	29.5	0.75	1.65	0	133	31
HNS	2013	29.5	0.5	1.75	0	148.5	31
HNS	2014	5.5	0	0.2	0	80.5	18
HNS	2015	24	0	0.35	0	80.5	24
HNS	2016	22	0	1.8	0	91	26
HNS	2017	22	0	1.2	0	91	28
HNS	2018	20	0	1.4	0	62	28
HNS	2019	19.5	0	1.5	0	72	58
HNS	2020	21	0	2.5	0	71.5	50
HNXS	2002	67.296			0			1
HNXS	2003	67.2			0			5.39511
HNXS	2004	65.28			0			27.2898
HNXS	2005	56.2	6.9	1.21	0	310	34	160
HNXS	2006	68.184	12.04	0.66	0	213	87	1860
HNXS	2007	53.8	25.07	0.2	0	220	75	13280
HNXS	2008	16.84	64.95	0.07	0	157	75	19260
HNXS	2009	7.93	67.6	0.06	0	106	55	25500
HNXS	2010	11.6	0	0.0625	0	124.5	43	5000
HNXS	2011	2.31	0	0.07	3.73	167	25	10
HNXS	2012	2.37	0	0.15	3.25	132	25	1
HNXS	2013	5.65	0	0.363	0.02	123.25	57	1
HNXS	2014	4.54	0.56	0.24	0	90	35	1
HNXS	2015	2.79	0	0.11	6.88	170	35	1
HNXS	2016	5.44	0	0.19	0.75	107	34	1
HNXS	2017	7.71	0	0.55	3.5	84	47	3
HNXS	2018	8.58	2.25	0.9	1.67	70.23	47	67.6
HNXS	2019	13	6.04	3.41	0.5	99.41	94	832
HNXS	2020	20.67	0.875	5.333	0	129.375	92
HNXS	2005	63.5	8.75	0.2	0	300	13
HNXS	2006	49.25	24.71	0.89	0	148	38	2100
HNXS	2007	88.17	6.17	0.07	0	240	23	22800
HNXS	2008	2.33	76	0	0	194	23	1200
HNXS	2009	1.5	80	0	0	114	4	2200
HNXS	2010	6	0	0	0	89	5
HNXS	2011	2.4	0	0	3.88	73	6
HNXS	2012	2.63	0	0	3.81	96	6
HNXS	2013	6.15	0	0.08	0.003	105	30
HNXS	2014	3.75	1.25	0.1	0	105	17
HNXS	2015	5.5	0	0.13	0.5	123	17
HNXS	2016	7.5	0	0.25	0	83	17
HNXS	2017	4	0	0.25	0	64	18
HNXS	2018	3	2.25	0.38	0	49.55	13
HNXS	2019	6.75	2.25	3.15	0	63.25	58
HNXS	2020	12.5	0	3	0	83	65
HNXS	2005	64.67	4.75	0.17	0	235	20	400
HNXS	2006	68.67	14.5	0.5	0	317	60	4800
HNXS	2007	11	78.17	0.05	0	280	51	36400
HNXS	2008	1.8	66	0	0	140	51	800
HNXS	2009	0.58	61.02	0	0	54	3	1200
HNXS	2010	3.5	0	0	0	140	3
HNXS	2011	1.7	0	0.13	0	171	5
HNXS	2012	1.95	0	0.4	0	147	5
HNXS	2013	8.1	0	0.973	0.002	85	39
HNXS	2014	1.75	0	0.13	0	69	12
HNXS	2015	1.15	0	0.1	0	87	12
HNXS	2016	7	0	0.3	0	112	15
HNXS	2017	5.5	0	0.45	0	58	15
HNXS	2018	6	5.75	0.73	0	35.41	14
HNXS	2019	7.5	3	4.55	0	65.25	60
HNXS	2020	14.25	0	6.5	0	95.25	45
HNXS	2002	68.48			0			1
HNXS	2003	67.2			0			5.39511
HNXS	2004	65.28			0			27.2898
HNXS	2005	76.34	16	0.17	0	190	22
HNXS	2006	69.5	3.33	0.47	0	192	47
HNXS	2007	46.67	4.33	0.37	0	160	39	1600
HNXS	2008	51.4	44.6	0.12	0	146	39	45600
HNXS	2009	24.5	55.54	0.11	0	118	47	92500
HNXS	2010	25.5	0	0.25	0	145	35
HNXS	2011	1.97	0	0	11.03	170	24
HNXS	2012	1.79	0	0	9.2	154	24
HNXS	2013	6.67	0	0.2	0.067	160	24
HNXS	2014	6.4	0	0.6	0	119	21
HNXS	2015	3	0	0.1	27	369	21
HNXS	2016	5	0	0.1	3	136	18
HNXS	2017	3	0	0.1	21	110	9
HNXS	2018	2	2	0.4	10	80	5
HNXS	2019	4	0	3.4	3	151	42
HNXS	2020	9	0	4	0	248	32
HNXS	2005	53.83	2.33	0.42	0	285	10	400
HNXS	2006	76.67	6.5	1.3	0	252	52	1600
HNXS	2007	40.17	26.17	0.35	0	220	46	4400
HNXS	2008	2.5	77.33	0.05	0	124	46	32400
HNXS	2009	1.85	68.82	0.05	0	110	5	8700
HNXS	2010	11.5	0	0	0	124	14
HNXS	2011	3.15	0	0.13	0	253	9
HNXS	2012	3.1	0	0.18	0	129	9
HNXS	2013	1.69	0	0.2	0	143	35
HNXS	2014	6.25	1	0.13	0	67	15
HNXS	2015	1.5	0	0.1	0	101	15
HNXS	2016	2.25	0	0.1	0	97	12
HNXS	2017	4	0	0.3	0	49	13
HNXS	2018	5.5	3.5	0.43	0	51.61	12
HNXS	2019	5.5	3.5	2.35	0	77	59
HNXS	2020	21.25	5.25	8.25	0	100.75	54
HNXS	2006	76.83
HNXS	2007	83
HNXS	2008	26.17
HNXS	2009	11.2
HNXS	2014	15
HNXS	2017	28.02
HNXS	2018	26.34
HNXS	2019	45.2
HNXS	2020	44.5
HNXS	2017	1.52
HNXS	2018	8.5312
HNXS	2019	9
HNXS	2020	22.5
HNXS	2002	42.1			0
HNXS	2002	55.7
HNXS	2002	93.4
HNXS	2002	76.8
HNE	2020	16.9		0.72			87
HNE	2015	38					22
HNE	2004	13.03		0.85			12
HNE	2007	24.88		0.58
HNE	2007	19.34
HNE	2008
HNE	2009	27.17					10
HNE	2010
HNE	2011	22.96		0.1485
HNE	2012	22.51		2.2475
HNE	2013	21.26		0.8613			42
HNE	2014	21.94		0.9207			19
HNE	2015	18.43		2.4356
HNE	2007	33.15
HNE	2007	37.58
HNS	2005	31.4		0.105			18
HNS	2017	27.78		0.15			55
HNS	2018	24.92		0.55
HNS	2019	27		0.45
HNS	2020	37		2
HNS	2014	53.83		4.5			54
HNS	2003	30.03
HNS	2001	35
HNS	2000
HNS	1999	41.5					35
HNS	1983	60
HNS	1990	35
HNS	1965	85
HNWN	2008	12					28
HNWN	2002						33
HNWN	2009	8					28
HNWN	2015	35					16
HNWN	2007	25
HNWN	2007	19.75
HNWN	2005	42.92					30
HNWN	2015						19
HNWN	2007	18.62
HNWN	2005	23.67					16
HNWN	2007	6.13					14
HNWN	2005	9					10

## Sheet:  coral life history
Region	Time	Coral Species	Competitive（per）	Generalist（per）	Stress-tolerant（per）	Weedy（per）	%Competitive	%Generalist	%Stress-tolerant	%Weedy	%Sum
HNE	2004	22	4	5	10	3	0.181818	0.227273	0.454545	0.136364	1
HNE	2005
HNE	2006	50	6	15	25	4	0.12	0.3	0.5	0.08	1
HNE	2007	59	10	19	26	4	0.169492	0.322034	0.440678	0.0677966	1
HNE	2008	30	5	6	17	2	0.166667	0.2	0.566667	0.0666667	1
HNE	2009	42	5	11	22	4	0.119048	0.261905	0.52381	0.0952381	1
HNE	2010	34	2	11	17	4	0.0588235	0.323529	0.5	0.117647	1
HNE	2011	34	2	11	17	4	0.0588235	0.323529	0.5	0.117647	1
HNE	2012	34	2	11	17	4	0.0588235	0.323529	0.5	0.117647	1
HNE	2013	34	2	11	17	4	0.0588235	0.323529	0.5	0.117647	1
HNE	2014	31	2	10	17	2	0.0645161	0.322581	0.548387	0.0645161	1
HNE	2015	30	3	8	17	2	0.1	0.266667	0.566667	0.0666667	1
HNE	2016	32	4	8	18	2	0.125	0.25	0.5625	0.0625	1
HNE	2017	30	3	7	18	2	0.1	0.233333	0.6	0.0666667	1
HNE	2018	29	3	7	17	2	0.103448	0.241379	0.586207	0.0689655	1
HNE	2019	61	11	23	24	3	0.180328	0.377049	0.393443	0.0491803	1
HNE	2020	60	10	23	24	3	0.166667	0.383333	0.4	0.05	1
HNS	2004	36	10	6	17	3	0.277778	0.166667	0.472222	0.0833333	1
HNS	2005	43	17	14	8	4	0.395349	0.325581	0.186047	0.0930233	1
HNS	2006	74	21	18	29	6	0.283784	0.243243	0.391892	0.0810811	1
HNS	2007	96	23	31	36	6	0.239583	0.322917	0.375	0.0625	1
HNS	2008	48	8	13	23	4	0.166667	0.270833	0.479167	0.0833333	1
HNS	2009	59	16	17	23	3	0.271186	0.288136	0.389831	0.0508475	1
HNS	2010	50	8	16	22	4	0.16	0.32	0.44	0.08	1
HNS	2011	50	8	16	22	4	0.16	0.32	0.44	0.08	1
HNS	2012	50	8	16	22	4	0.16	0.32	0.44	0.08	1
HNS	2013	50	8	16	22	4	0.16	0.32	0.44	0.08	1
HNS	2014	44	8	12	21	3	0.181818	0.272727	0.477273	0.0681818	1
HNS	2015	44	8	12	21	3	0.181818	0.272727	0.477273	0.0681818	1
HNS	2016	49	10	13	23	3	0.204082	0.265306	0.469388	0.0612245	1
HNS	2017	47	9	12	23	3	0.191489	0.255319	0.489362	0.0638298	1
HNS	2018	45	9	12	22	2	0.2	0.266667	0.488889	0.0444444	1
HNS	2019	71	16	25	26	4	0.225352	0.352113	0.366197	0.056338	1
HNS	2020	69	15	24	26	4	0.217391	0.347826	0.376812	0.057971	1
HNXS	2002
HNXS	2003
HNXS	2004
HNXS	2005	35	12	6	13	4	0.342857	0.171429	0.371429	0.114286	1
HNXS	2006	87	23	21	32	11	0.264368	0.241379	0.367816	0.126437	1
HNXS	2007	75	20	19	28	8	0.266667	0.253333	0.373333	0.106667	1
HNXS	2008	75	20	19	28	8	0.266667	0.253333	0.373333	0.106667	1
HNXS	2009	53	13	11	22	7	0.245283	0.207547	0.415094	0.132075	1
HNXS	2010	43	8	10	20	5	0.186047	0.232558	0.465116	0.116279	1
HNXS	2011	25	3	4	13	5	0.12	0.16	0.52	0.2	1
HNXS	2012	25	3	4	13	5	0.12	0.16	0.52	0.2	1
HNXS	2013	57	17	13	20	7	0.298246	0.22807	0.350877	0.122807	1
HNXS	2014	35	8	11	12	4	0.228571	0.314286	0.342857	0.114286	1
HNXS	2015	35	8	11	12	4	0.228571	0.314286	0.342857	0.114286	1
HNXS	2016	34	8	10	12	4	0.235294	0.294118	0.352941	0.117647	1
HNXS	2017	46	9	13	17	7	0.195652	0.282609	0.369565	0.152174	1
HNXS	2018	46	9	13	17	7	0.195652	0.282609	0.369565	0.152174	1
HNXS	2019	94	18	29	40	7	0.191489	0.308511	0.425532	0.0744681	1
HNXS	2020	92	17	29	39	7	0.184783	0.315217	0.423913	0.076087	1
